# Supplementary material for: UX Evaluation with Standardized Questionnaires in Ubiquitous Computing and Ambient Intelligence: A Systematic Literature Review
Source: Hindawi journal article supplement (doi:10.1155/2021/5518722), 2021-05-04
Supplement: f1 [file 5518722.f1.pdf]

## Supplementary file

# UX Evaluation with Standardized Questionnaires in Ubiquitous Computing and Ambient Intelligence: A Systematic Literature Review

Ignacio Díaz-Oreiro<sup>1,2</sup>, Gustavo López<sup>1,2</sup>, Luis Quesada<sup>2</sup> and Luis A. Guerrero<sup>2</sup>

<sup>1</sup> Information and Communication Technologies Research Center, University of Costa Rica, 11501-2060 San José, Costa Rica; ignacio.diazoreiro@ucr.ac.cr; gustavo.lopez\_h@ucr.ac.cr

<sup>2</sup> School of Computer Science and Informatics, University of Costa Rica, 11501-2060 San José, Costa Rica; luis.quesada@ecci.ucr.ac.cr; luis.guerrero@ecci.ucr.ac.cr

Correspondence should be addressed to Ignacio Díaz-Oreiro; ignacio.diazoreiro@ucr.ac.cr

### Systematic Literature Review full paper included references:

- [1] M. Schrepp, A. Hinderks, and J. Thomaschewski, "Applying the user experience questionnaire (UEQ) in different evaluation scenarios," in *Lecture Notes in Computer Science (including subseries Lecture Notes in Artificial Intelligence and Lecture Notes in Bioinformatics)*, 2014.
- [2] C. Lallemand and V. Koenig, "How Could an Intranet be Like a Friend to Me?," in *Proceedings of the European Conference on Cognitive Ergonomics 2017 - ECCE 2017*, 2017.
- [3] S. Aisyah, S. Qiu, M. Rauterberg, and J. Hu, "Exploring Social Interaction with Everyday Object based on Perceptual Crossing," pp. 11–18, 2016.
- [4] C. Bach and R. Bernhaupt, "Mobile Applications for Incident Reporting Systems in Urban Contexts : Lessons Learned from an Empirical Study."
- [5] M. Keck *et al.*, "Towards Glyph-based Visualizations for Big Data Clustering," in *Proceedings of the 10th International Symposium on Visual Information Communication and Interaction*, 2017, pp. 129–136.
- [6] J. Kildal, A. Lucero, and M. Boberg, "Twisting Touch: Combining Deformation and Touch As Input Within the Same Interaction Cycle on Handheld Devices," in *Proceedings of the 15th International Conference on Human-computer Interaction with Mobile Devices and Services*, 2013, pp. 237–246.
- [7] F. Kiss, V. Schwind, S. Schneegass, and N. Henze, "Design and Evaluation of a Computer-actuated Mouse," in *Proceedings of the 16th International Conference on Mobile and Ubiquitous Multimedia*, 2017, pp. 261–271.
- [8] J. F. Kraft, "Transition Animations Support Orientation in Mobile Interfaces Without Increased User Effort Chair of Psychological Ergonomics," pp. 1–6, 2017.
- [9] M. Krause, S. Weichelt, and K. Bengler, "Malfunction of a Traffic Light Assistant Application on a Smartphone," pp. 3–7, 2015.
- [10] A. Krekhov, K. Emmerich, and M. Babinski, "Gestures From the Point of View of an

- Audience : Toward Anticipatable Interaction of Presenters With 3D Content .," 2017.
- [11] S. Kujala and T. Miron-Shatz, "Emotions, Experiences and Usability in Real-life Mobile Phone Use," in *Proceedings of the SIGCHI Conference on Human Factors in Computing Systems*, 2013, pp. 1061–1070.
  - [12] J. Kunkel, B. Loepp, and J. Ziegler, "A 3D Item Space Visualization for Presenting and Manipulating User Preferences in Collaborative Filtering," in *Proceedings of the 22Nd International Conference on Intelligent User Interfaces*, 2017, pp. 3–15.
  - [13] F. Lachner, H. Schneider, L. Simon, and A. Butz, "Nurturing Empathy Between UX Design Teams and Users in Digitally-mediated User Research," in *Proceedings of the 10th Nordic Conference on Human-Computer Interaction*, 2018, pp. 273–285.
  - [14] C. Lallemand and V. Koenig, "Lab Testing Beyond Usability: Challenges and Recommendations for Assessing User Experiences," 2017.
  - [15] C. Bach, N. Gauducheau, and P. Salembier, "Combining interviews and scales in the multidimensional evaluation of User Experience . A case study in," no. August, pp. 24–26, 2011.
  - [16] H. Lang, M. Klepsch, F. Nothdurft, T. Seufert, and W. Minker, "Are Computers Still Social Actors?," in *CHI '13 Extended Abstracts on Human Factors in Computing Systems*, 2013, pp. 859–864.
  - [17] M. Lee, N. Norouzi, G. Bruder, P. J. Wisniewski, and G. F. Welch, "The Physical-virtual Table: Exploring the Effects of a Virtual Human's Physical Influence on Social Interaction," in *Proceedings of the 24th ACM Symposium on Virtual Reality Software and Technology*, 2018, pp. 25:1–25:11.
  - [18] S. Lemcke, K. Haedge, R. Zender, and U. Lucke, "RouteMe : a multilevel pervasive game on mobile ad hoc routing," *Pers. Ubiquitous Comput.*, vol. 19, no. 3, pp. 537–549, 2015.
  - [19] A. Lucero, "Collaborative Use of Mobile Phones for Brainstorming," pp. 337–340, 2010.
  - [20] A. Lucero, J. Holopainen, and T. Jokela, "MobiComics: Collaborative Use of Mobile Phones and Large Displays for Public Expression," in *Proceedings of the 14th International Conference on Human-computer Interaction with Mobile Devices and Services*, 2012, pp. 383–392.
  - [21] A. Lucero, J. Holopainen, and T. Jokela, "Pass-Them-Around : Collaborative Use of Mobile Phones for Photo Sharing," pp. 1787–1796, 2011.
  - [22] A. Lucero and A. Vetek, "NotifEye : Using Interactive Glasses to Deal with Notifications while Walking in Public," 2014.
  - [23] G. Madlmayr and D. Brandlberger, "Evaluation of SmartCard Webserver as an Application Platform from a User ' s Perspective," no. c, pp. 360–363, 2008.
  - [24] C. Mai, L. Rieger, and S. A. Bartsch, "Evaluating Shared Surfaces for Co-Located Mixed-Presence Collaboration," pp. 1–5, 2018.
  - [25] J. Majors, A. Bengs, S. Granlund, A. Ylitalo, and M. Byholm, "Moodle Moods? A User Experience Study of a Small Private Online Course for Higher Teacher Education," *Mindtrek'18 Proc. 22Nd Int. Acad. Mindtrek Conf.*, pp. 228–235, 2015.
  - [26] P. Bader, V. Schwind, N. Henze, S. Schneegass, and N. Broy, "Design and Evaluation of a Layered Handheld 3D Display with Touch-Sensitive Front and Back," pp. 315–318, 2014.
  - [27] V. Mäkelä, T. Heimonen, M. Luhtala, and M. Turunen, "Information Wall : Evaluation of a Gesture-Controlled Public Display," 2014.
  - [28] P. Marti and I. Iacono, "Evaluating the Experience of Use of a Squeezable Interface," in *Proceedings of the 11th Biannual Conference on Italian SIGCHI Chapter*, 2015, pp. 42–49.
  - [29] S. Maurer, R. Erbach, I. Kraiem, S. Kuhnert, P. Grimm, and E. Rukzio, "Designing a Guardian Angel: Giving an Automated Vehicle the Possibility to Override Its Driver," in *Proceedings of the 10th International Conference on Automotive User Interfaces and Interactive Vehicular*

*Applications*, 2018, pp. 341–350.

- [30] S. Mayer, L. Lischke, A. Lankswert, H. V. Le, and N. Henze, “How to Communicate New Input Techniques,” in *Proceedings of the 10th Nordic Conference on Human-Computer Interaction*, 2018, pp. 460–472.
- [31] S. Mehrotra, “Potmote : A TV Remote Control for Older Adults,” pp. 486–488, 2018.
- [32] E. D. Mekler and K. Hornbæk, “Momentary Pleasure or Lasting Meaning?: Distinguishing Eudaimonic and Hedonic User Experiences,” in *Proceedings of the 2016 CHI Conference on Human Factors in Computing Systems*, 2016, pp. 4509–4520.
- [33] B. Merz, A. N. Tuch, and K. Opwis, “Perceived User Experience of Animated Transitions in Mobile User Interfaces,” in *Proceedings of the 2016 CHI Conference Extended Abstracts on Human Factors in Computing Systems*, 2016, pp. 3152–3158.
- [34] J. Paivainen, K. Väänänen-Vainio-Mattila, H. Heikki, “Social Devices – A Laboratory Study on User Preferences of Device Proactivity,” pp. 223–228, 2013.
- [35] C. Meurisch, F. Kohnh, and M. Max, “NICER911 : Ad-hoc Communication and Emergency Services Using Networking Smartphones and Wireless Home Routers Stefan Wullko e,” no. iii, pp. 1–2.
- [36] C. Meurisch, B. Schmidt, M. Scholz, I. Schweizer, and M. Mühlhäuser, “Labels – Quantified Self App for Human Activity Sensing,” pp. 1413–1422, 2015.
- [37] Y. Barhoush, M. Mustonen, G. V. Georgiev, and D. Ferreira, “The Gravity of Thought : Exploring Positively Surprising Interactions,” pp. 333–338, 2018.
- [38] J. Meyer and A. Kazakova, “Visualization of Complex Health Data on Mobile Devices,” pp. 31–34.
- [39] J. Meyer, T. Schoormann, and D. Wegmann, “A Smart Health Device to Measure Waist Circumference,” pp. 3–4.
- [40] A. Miclaus, M. Beigl, and M. Berning, “IndianaJS : Building spatially aware web sites for the Web of Things,” no. Figure 1, pp. 2–7.
- [41] M. Minge, K. Lorenz, S. Dannehl, and N. Jankowski, “Developing a Mobile System for Children and Teenagers with Scoliosis to Improve Therapy Adherence,” pp. 1–8, 2018.
- [42] W. Mobilehci, “User-centered Interaction Design of a Mobile Learning Platform for the Generation 60 + Abstract,” no. Mci, pp. 924–927.
- [43] R. Montanari *et al.*, “Saferider – Results From Yamaha Test Site On Advanced Rider Assistance Syste,” pp. 132–138, 2011.
- [44] A. Möser, T. Reufer, and C. Geiger, “Multitouch and Pen Interaction for 3D Configuration of Virtual Yachts at Trade Fairs,” in *Proceedings of the 8th International Conference on Advances in Computer Entertainment Technology*, 2011, pp. 74:1–74:2.
- [45] M. Möttus, “Evaluating Aesthetics During Interaction Episodes.”
- [46] H. Müller, C. Pieper, W. Heuten, and S. Boll, “It’s Not That Long!: Helping Children to Understand Time with an Ambient Light Display,” in *Proceedings of the The 15th International Conference on Interaction Design and Children*, 2016, pp. 356–366.
- [47] J. Müller *et al.*, “Honeypot - A Socializing App to Promote Train Commuters ’ Wellbeing,” 2018.
- [48] V. Becker and F. Rauchenstein, “Investigating Universal Appliance Control through Wearable Augmented Reality,” vol. 2019, 2019.
- [49] L. J. Müller, “Facets In HCI : Towards Understanding Eudaimonic UX – Preliminary Findings,” pp. 2283–2288, 2015.
- [50] L. J. Müller, “Hedonic Enjoyment And Personal Expressiveness In Positive User Experiences,” pp. 3166–3172, 2016.
- [51] S. Müller, A. M. Carl, P. Klein, H. Rieß, and D. Bender, “Examples for a ubiquitous mobility

assistant as outcome of the inDAgo project,” pp. 2–5.

- [52] A. Niels, S. R. Guetzka, and M. Janneck, “The Impact of Causal Attributions on System Evaluation in Usability Tests,” in *Proceedings of the 2016 CHI Conference on Human Factors in Computing Systems*, 2016, pp. 3115–3125.
- [53] H. S. Nielsen, M. P. Olsen, M. B. Skov, and J. Kjeldskov, “JuxtaPinch: Exploring Multi-device Interaction in Collocated Photo Sharing,” in *Proceedings of the 16th International Conference on Human-computer Interaction with Mobile Devices & Services*, 2014, pp. 183–192.
- [54] A. Nutsi, “Usability Guidelines for Co-Located Multi-User Interaction on Wall Displays,” in *Proceedings of the 2015 International Conference on Interactive Tabletops & Surfaces*, 2015, pp. 433–438.
- [55] M. Obrist *et al.*, “Connecting TV & PC : An In-Situ Field Evaluation of an Unified Electronic Program Guide Concept,” pp. 91–100.
- [56] C. Oechsner and F. Alt, “VRPursuits : Interaction in Virtual Reality using Smooth Pursuit Eye Movements.”
- [57] A. Van Oosterhout and M. B. Alonso, “Ripple Thermostat : Affecting the Emotional Experience through Interactive Force Feedback and Shape Change,” pp. 1–12, 2018.
- [58] S. Paasovaara, M. Paldanius, P. Saarinen, J. Häkkinen, and K. Väänänen-Vainio-Mattila, “The Secret Life of My Dog: Design and Evaluation of Paw Tracker Concept,” in *Proceedings of the 13th International Conference on Human Computer Interaction with Mobile Devices and Services*, 2011, pp. 231–240.
- [59] A. Bellucci, P. Diaz, and I. Aedo, “A See-Through Display for Interactive Museum Showcases,” in *Proceedings of the 2015 International Conference on Interactive Tabletops & Surfaces*, 2015, pp. 301–306.
- [60] M. Pakanen, P. Alavesä, and H. Kukka, “Hybrid Campus Art : Bridging Two Realities through 3D Art,” pp. 393–399.
- [61] J. Palviainen, T. Kilamo, J. Koskinen, J. Lautamäki, T. Mikkonen, and A. Nieminen, “Design Framework Enhancing Developer Experience in Collaborative Coding Environment,” in *Proceedings of the 30th Annual ACM Symposium on Applied Computing*, 2015, pp. 149–156.
- [62] J. Palviainen, K. Kuusinen, and K. Väänänen-Vainio-Mattila, “Designing for Presence in Social Television Interaction,” in *Proceedings of the 12th International Conference on Mobile and Ubiquitous Multimedia*, 2013, pp. 9:1–9:10.
- [63] P. Panhey, D. Tanja, S. Schneegass, D. Wenig, and F. Alt, “What People Really Remember – Understanding Cognitive Effects When Interacting with Large Displays,” pp. 103–106, 2015.
- [64] T. Partala and M. Salminen, “User experience of photorealistic urban pedestrian navigation,” in *Proceedings of the International Working Conference on Advanced Visual Interfaces - AVI '12*, 2012.
- [65] G. Peedu and D. Lamas, “Minu Viljandi: A Case Study on the Effects of Introducing Web 2.0 Features in e-Government Services on the Overall User Experience Perception,” in *Proceedings of the 5th International Conference on Theory and Practice of Electronic Governance*, 2011, pp. 305–308.
- [66] H. Perkunder, J. H. Israel, and M. Alexa, “Shape Modeling with Sketched Feature Lines in Immersive 3D Environments,” 2010.
- [67] E. Pescara, A. Wolpert, M. Budde, A. Schankin, and M. Beigl, “Lifetact: Utilizing Smartwatches As Tactile Heartbeat Displays in Video Games,” in *Proceedings of the 16th International Conference on Mobile and Ubiquitous Multimedia*, 2017, pp. 97–101.
- [68] E. Pesonen, “User Experience of Digital News : Two Semi-long Term Field Studies,” no. Mum, pp. 51–63, 2015.
- [69] T. P. Pham and Y.-L. Theng, “Game Controllers for Older Adults: Experimental Study on

- Gameplay Experiences and Preferences," in *Proceedings of the International Conference on the Foundations of Digital Games*, 2012, pp. 284–285.
- [70] L. Bergé, E. Dubois, and M. Raynal, "Design and Evaluation of an 'Around the SmartPhone' Technique for 3D Manipulations on Distant Display," pp. 69–78.
  - [71] M. Porcheron, A. Lucero, and J. E. Fischer, "Co-Curator : Designing for Mobile Ideation in Groups," 2016.
  - [72] A. Prinz, P. Menschner, and J. M. Leimeister, "Has NFC the Potential to Revolutionize Self-reported Electronic Data Capture ? – An Empirical Comparison of Different Interaction Concepts," pp. 1679–1684, 2012.
  - [73] A. Pyae and T. N. Joelsson, "Investigating the Usability and User Experiences of Voice User Interface : A Case of Google Home Smart Speaker," pp. 127–131.
  - [74] E. De Quincey, C. Briggs, and R. Waller, "Student Centred Design of a Learning Analytics System," pp. 353–362.
  - [75] K. El Raheb, A. Kasomoulis, A. Katifori, and Y. Ioannidis, "A Web-based system for annotation of dance multimodal recordings by dance practitioners and experts," pp. 1–8, 2018.
  - [76] K. El Raheb, G. Tsampounaris, A. Katifori, and Y. Ioannidis, "Choreomorphy : a Whole-body Interaction Experience for Dance Improvisation and Visual Experimentation."
  - [77] J. Rantala, S. Müller, R. Raisamo, K. Suhonen, K. Väänänen-Vainio-Mattila, and V. Lantz, "User Experiences of Mobile Audio Conferencing with Spatial Audio, Haptics and Gestures," in *Proceedings of the 15th ACM on International Conference on Multimodal Interaction*, 2013, pp. 59–66.
  - [78] M. Rehm, K. Leichtenstern, and J. Plomer, "Gesture Activated Mobile Edutainment ( GAME ) Intercultural Training of Nonverbal Behavior with Mobile Phones Categories and Subject Descriptors."
  - [79] A. V. Reinschluessel *et al.*, "Virtual Reality for User-Centered Design and Evaluation of Touch-free Interaction Techniques for Navigating Medical Images in the Operating Room," in *Proceedings of the 2017 CHI Conference Extended Abstracts on Human Factors in Computing Systems*, 2017, pp. 2001–2009.
  - [80] X. Ren, Y. Ma, Y. Lu, and A. Brombacher, "ShuttleKicker+: Designing Gamified Sonification to Augment the Physical Leisure Activity," in *Extended Abstracts Publication of the Annual Symposium on Computer-Human Interaction in Play*, 2017, pp. 471–478.
  - [81] L. Bergé *et al.*, "Exploring Smartphone - Based Interaction with Overview + Detail Interfaces on 3D Public Displays," pp. 125–134, 2014.
  - [82] E. Reponen, "The Whole World under Your Feet : Field Trial of Embodied Browsing of Geotagged Content," vol. 1, no. 212, pp. 291–298, 2012.
  - [83] E. Reponen and J. Keränen, "Mobile Interaction with Real-time Geospatial Data by Pointing Through Transparent Earth," in *Proceedings of the 6th Nordic Conference on Human-Computer Interaction: Extending Boundaries*, 2010, pp. 403–412.
  - [84] E. Reponen and H. Korhonen, "World-Wide Access to Geospatial Data by Pointing Through The Earth," pp. 3895–3900, 2010.
  - [85] T. Reufer, M. Panknin, and C. Geiger, "SensoDroid - Multimodal Interaction Controlled Mobile Gaming," pp. 32–36, 2010.
  - [86] J. Riemann, F. Müller, and M. Mühlhäuser, "An Evaluation of Hybrid Stacking on Interactive Tabletops," pp. 13–20, 2017.
  - [87] M. Rittenbruch, "Evaluating the Use of a Very Large-scale Presentation and Collaboration Framework," pp. 124–129, 2014.
  - [88] K. Rogers *et al.*, "P.I.A.N.O.: Faster Piano Learning with Interactive Projection," in *Proceedings of the Ninth ACM International Conference on Interactive Tabletops and Surfaces*, 2014, pp. 149–

158.

- [89] F. Roider, L. Reisig, and T. Gross, "Just Look : The Benefits of Gaze-Activated Voice Input in the Car," 2018.
- [90] S. L. Rojas *et al.*, "Natural Europe Educational Games Suite : Using Structured Museum-Data for Creating Mobile Educational Games," 2014.
- [91] B. Rossmys and A. Wiethoff, "COMB – Shape as a Meaningful Element of Interaction .," pp. 287–295, 2019.
- [92] T. U. Berlin and N. Bergner, "On Supplementing Theoretical Computer Science Courses using," 2018.
- [93] D. Rudi, P. Kiefer, C. Peier, and M. Raubal, "Interacting with Maps on Optical Head-Mounted Displays," pp. 3–12.
- [94] S. Rümelin and A. Butz, "How To Make Large Touch Screens Usable While Driving," pp. 48–55, 2013.
- [95] C. Sandoval, C. Montero, T. Jokela, and A. Lucero, "Replicating a Study of Collaborative Use of Mobile Phones for Photo Sharing in a Different Cultural Context," in *Proceedings of the 18th International Academic MindTrek Conference: Media Business, Management, Content & Services*, 2014, pp. 7–10.
- [96] C. Schartmüller, "Steer-By-WiFi : Lateral Vehicle Control for Take-Overs with Nomadic Devices," 2018.
- [97] G. Schiavo, E. Mencarini, K. B. A. Vovard, and M. Zancanaro, "Sensing and Reacting to Users ' Interest : an Adaptive Public Display," no. i, pp. 1545–1550, 2013.
- [98] M. Schirmer, J. Hartmann, S. Bertel, and F. Echter, "Shoe Me the Way: A Shoe-Based Tactile Interface for Eyes-Free Urban Navigation," in *Proceedings of the 17th International Conference on Human-Computer Interaction with Mobile Devices and Services*, 2015, pp. 327–336.
- [99] C. Schlösser, B. Schröder, L. Cedli, and A. Kienle, "Beyond Gaze Cursor: Exploring Information-based Gaze Sharing in Chat," in *Proceedings of the Workshop on Communication by Gaze Interaction*, 2018, pp. 10:1–10:5.
- [100] S. Schmidt, F. Steinicke, A. Irlitti, and B. H. Thomas, "Floor-Projected Guidance Cues for Collaborative Exploration of Spatial Augmented Reality Setups," pp. 279–289, 2018.
- [101] S. Schmidt-rauch and G. Schwabe, "From Telesales to Tele-Advisory in Travel Agencies : Business Problems , Generic Design Goals and Requirements," vol. 2, no. 3, 2011.
- [102] S. Schneegass and N. Henze, "Harvesting Social Media for Assessing User Experience," pp. 931–934, 2014.
- [103] R. Bernhaupt, A. Boldt, T. Mirlacher, D. Wilfinger, and M. Tscheligi, "Using Emotion in Games: Emotional Flowers," in *Proceedings of the International Conference on Advances in Computer Entertainment Technology*, 2007, pp. 41–48.
- [104] F. Schulz and C. Geiger, "ANTracks - generative mobile music composition," pp. 302–305, 2009.
- [105] J. Seeburger and D. Tjondronegoro, "The Sound of Music : Sharing Song Selections between Collocated Strangers in Public Urban Places," 2012.
- [106] P. Shorey and A. Girouard, "Bendroller:: An Exploration of In-Game Action Mappings with a Deformable Game Controller," in *Proceedings of the 2017 CHI Conference on Human Factors in Computing Systems*, 2017, pp. 1447–1458.
- [107] S. A. Siddiqui, D. Herzog, and W. Wörndl, "Real-Time Public Transport Navigation on Smartwatches: A Comparison with a Smartphone-based Solution," in *Adjunct Publication of the 25th Conference on User Modeling, Adaptation and Personalization*, 2017, pp. 261–266.
- [108] J. Silvennoinen, "Experiencing Visual Usability and Aesthetics in Two Mobile Application Contexts," vol. 10, no. 1, pp. 46–62, 2015.

- [109] M. Skowronski, J. Wieland, D. Fink, C. Gröschel, and H. Reiterer, "Blended Museum : The Interactive Exhibition ' Rebuild Palmyra ?,'" pp. 529–535, 2018.
- [110] M. Speicher, S. Cucerca, and A. Krüger, "VRShop: A Mobile Interactive Virtual Reality Shopping Environment Combining the Benefits of On- and Offline Shopping," *Proc. ACM Interact. Mob. Wearable Ubiquitous Technol.*, vol. 1, no. 3, pp. 102:1--102:31, 2017.
- [111] M. Speicher, A. M. Feit, P. Ziegler, and A. Krüger, "Selection-based Text Entry in Virtual Reality," in *Proceedings of the 2018 CHI Conference on Human Factors in Computing Systems*, 2018, pp. 647:1--647:13.
- [112] M. Speicher, P. Hell, F. Daiber, and A. Krüger, "A Virtual Reality Shopping Experience using the Apartment Metaphor."
- [113] J. Spieker, "SMALLCAR – A Scaled Model for Ambient Light Display Creation and Review of In-Vehicle Light Patterns," 2017.
- [114] P. Almeida, J. de Abreu, S. Fernandes, and E. Oliveira, "Content Unification in iTV to Enhance User Experience: The UltraTV Project," in *Proceedings of the 2018 ACM International Conference on Interactive Experiences for TV and Online Video*, 2018, pp. 167–172.
- [115] R. Bernhaupt, F. Manciet, and M. Pirker, "User Experience As a Parameter to Enhance Automation Acceptance: Lessons from Automating Articulatory Tasks," in *Proceedings of the 5th International Conference on Application and Theory of Automation in Command and Control Systems*, 2015, pp. 140–150.
- [116] F. Steinberger, P. Proppe, R. Schroeter, and F. Alt, "CoastMaster: An Ambient Speedometer to Gamify Safe Driving," in *Proceedings of the 8th International Conference on Automotive User Interfaces and Interactive Vehicular Applications*, 2016, pp. 83–90.
- [117] F. Steinberger, R. Schroeter, M. Foth, and D. Johnson, "Designing Gamified Applications That Make Safe Driving More Engaging," in *Proceedings of the 2017 CHI Conference on Human Factors in Computing Systems*, 2017, pp. 2826–2839.
- [118] E. Stojmenova, J. Guna, D. Hauswirth, R. Winkler, M. Ninaus, and M. Pogačnik, "WEB on TV: Cross-National User Study for Designing Better User Experience," in *Proceedings of International Conference on Making Sense of Converging Media*, 2013, pp. 17:17--17:19.
- [119] C. Study, "Vintage Radio Interface : Analog Control for Digital Collections," pp. 649–659, 2012.
- [120] K. Suhonen, S. Müller, J. Rantala, K. Väänänen-Vainio-Mattila, R. Raisamo, and V. Lantz, "Haptically Augmented Remote Speech Communication: A Study of User Practices and Experiences," in *Proceedings of the 7th Nordic Conference on Human-Computer Interaction: Making Sense Through Design*, 2012, pp. 361–369.
- [121] S. Tarik and S. A. P. Ag, "Support for Collaborative Situation Analysis and Planning in Crisis Management Teams using Interactive Tabletops," pp. 273–282, 2013.
- [122] D. Telekom, C. Kühnel, B. Weiss, and S. Möller, "Evaluating Multimodal Systems," pp. 286–294, 2010.
- [123] B. Thorsten, J. Gerken, and H. Reiterer, "Usability of Overview-Supported Zooming on Small Screens with Regard to Individual Differences in Spatial Ability," pp. 233–240.
- [124] P. Tobias Fischer, S. Kuliga, M. Eisenberg, and I. Amin, "Space is Part of the Product: Using AttrakDiff to Identify Spatial Impact on User Experience with Media Façades," 2018.
- [125] R. Tscharn, T. Au\ssenhofer, D. Reisler, and J. Hurtienne, "'Turn Left After the Heater': Landmark Navigation for Visually Impaired Users," in *Proceedings of the 18th International ACM SIGACCESS Conference on Computers and Accessibility*, 2016, pp. 295–296.
- [126] M. Berning, F. Braun, T. Riedel, and M. Beigl, "ProximityHat – A Head-Worn System for Subtle Sensory Augmentation with Tactile Stimulation," pp. 31–38, 2015.
- [127] A. N. Tuch and P. V. A. N. Schaik, "Leisure and Work , Good and Bad : The Role of Activity

- Domain and Valence in Modeling User Experience," vol. 23, no. 6, 2016.
- [128] A. N. Tuch, R. Trusell, and K. Hornbæk, "Analyzing Users' Narratives to Understand Experience with Interactive Products," in *Proceedings of the SIGCHI Conference on Human Factors in Computing Systems*, 2013, pp. 2079–2088.
  - [129] E. Tunca, "Advantages of Active Haptics on Touch Surfaces," pp. 137–144, 2016.
  - [130] K. Väänänen-vainio-mattila, K. Suhonen, T. Gonsalves, M. Schrader, and T. Järvenpää, "Carpe Diem : Exploring User Experience and Intimacy in Eye-Based Video Conferencing," pp. 113–122, 2011.
  - [131] S. Dantzig, G. Geleijnse, and A. T. Halteren, "Toward a Persuasive Mobile Application to Reduce Sedentary Behavior," *Pers. Ubiquitous Comput.*, vol. 17, no. 6, pp. 1237–1246, 2013.
  - [132] P. van Schaik, M. Hassenzahl, and J. Ling, "User-Experience from an Inference Perspective," *ACM Trans. Comput. Interact.*, vol. 19, no. 2, pp. 1–25, 2012.
  - [133] J. Varsaluoma and P. O. Box, "Usefulness of Long-Term User Experience Evaluation to Product Development : Practitioners' Views from Three Case Studies," pp. 79–88, 2014.
  - [134] J. Varsaluoma and F. Sahar, "Measuring retrospective user experience of non-powered hand tools," in *Proceedings of the 18th International Academic MindTrek Conference on Media Business, Management, Content & Services - AcademicMindTrek '14*, 2014.
  - [135] M. Visualizations *et al.*, "Exploring Gaze-adaptive Features for Interacting with," pp. 85–92.
  - [136] J. Vitale, M. Tonkin, S. Herse, J. Clark, X. Wang, and W. Judge, "Be More Transparent and Users Will Like You : A Robot Privacy and User Experience Design Experiment," pp. 379–387, 2018.
  - [137] N. Bevan, Z. Liu, C. Barnes, M. Hassenzahl, and W. Wei, "Comparison of Kansei Engineering and AttrakDiff to Evaluate Kitchen Products."
  - [138] Z. Vosough, D. Kammer, M. Keck, and R. Groh, "Visualizing Uncertainty in Flow Diagrams: A Case Study in Product Costing," in *Proceedings of the 10th International Symposium on Visual Information Communication and Interaction*, 2017, pp. 1–8.
  - [139] T. Walsh, J. Varsaluoma, S. Kujala, P. Nurkka, H. Petrie, and C. Power, "Axe UX," in *Proceedings of the 18th International Academic MindTrek Conference on Media Business, Management, Content & Services - AcademicMindTrek '14*, 2014.
  - [140] J. Walter, "PRICON : Self-determined privacy in the connected car motivated by the privacy calculus model," pp. 421–427.
  - [141] C. Wang, "' Liking ' other Drivers ' Behavior while Driving Abstract."
  - [142] Y. Wang, U. Pfeil, and H. Reiterer, "Supporting Self-Assembly : The IKEA Effect on Mobile Health Persuasive Technology," pp. 19–22.
  - [143] D. Wilfinger, M. Pirker, R. Bernhaupt, and M. Tscheligi, "Evaluating and Investigating an iTV Interaction Concept in the Field," pp. 175–178, 2009.
  - [144] A. Winkler, K. Baumann, S. Huber, R. Tscharn, and J. Hurtienne, "Evaluation Of An Application Based On Conceptual Metaphors For Social Interaction Between Vehicles," pp. 1148–1159, 2016.
  - [145] M. Wirth, S. Gradl, D. Poimann, H. Schaeffe, J. Matlok, and H. Koerger, "Assessment of Perceptual-Cognitive Abilities among Athletes in Virtual Environments : Exploring Interaction Concepts for Soccer Players," pp. 1013–1024, 2018.
  - [146] M. Wirth, S. Gradl, J. Sembdner, S. Kuhrt, and B. M. Eskofier, "Evaluation of Interaction Techniques for a Virtual Reality Reading Room in Diagnostic Radiology," in *Proceedings of the 31st Annual ACM Symposium on User Interface Software and Technology*, 2018, pp. 867–876.
  - [147] K. Wolf and N. Henze, "Comparing Pointing Techniques for Grasping Hands on Tablets," 2014.
  - [148] G. Beyer *et al.*, "Audience Behavior Around Large Interactive Cylindrical Screens," in

- Proceedings of the SIGCHI Conference on Human Factors in Computing Systems*, 2011, pp. 1021–1030.
- [149] K. Wolf and J. Willaredt, “PickRing : Seamless Interaction through Pick - Up Detection,” pp. 13–20, 2015.
  - [150] J. Zagermann, U. Pfeil, C. Acevedo, and H. Reiterer, “Studying the Benefits and Challenges of Spatial Distribution and Physical Affordances in a Multi-Device Workspace,” pp. 249–259, 2017.
  - [151] J. Zagermann, U. Pfeil, D. Fink, P. Von Bauer, and H. Reiterer, “Memory in Motion : The Influence of Gesture- and Touch-Based Input Modalities on Spatial Memory,” pp. 1899–1910, 2017.
  - [152] S. F. M. Zaidi, C. Duthie, E. Carr, and S. H. A. El Maksoud, “Conceptual Framework for the Usability Evaluation of Gamified Virtual Reality Environment for Non-gamers,” in *Proceedings of the 16th ACM SIGGRAPH International Conference on Virtual-Reality Continuum and Its Applications in Industry*, 2018, pp. 13:1–13:4.
  - [153] B. Bittner, I. Aslan, C. T. Dang, and E. André, “Of Smarthomes, IoT Plants, and Implicit Interaction Design,” in *Proceedings of the Thirteenth International Conference on Tangible, Embedded, and Embodied Interaction*, 2019, pp. 145–154.
  - [154] C. Boddien *et al.*, “SketchTab3d : A Hybrid Sketch Library using Tablets and Immersive 3D Environments,” pp. 101–104, 2017.
  - [155] S. Bordin, M. Zancanaro, and A. De Angeli, “Touching Dante: A Proximity-based Paradigm for Tabletop Browsing,” in *Proceedings of the Biannual Conference of the Italian Chapter of SIGCHI*, 2013, pp. 27:1–27:10.
  - [156] P. Brauner, J. van Heek, M. Ziefle, N. A. Hamdan, and J. Borchers, “Interactive FURniTURE: Evaluation of Smart Interactive Textile Interfaces for Home Environments,” in *Proceedings of the 2017 ACM International Conference on Interactive Surfaces and Spaces*, 2017, pp. 151–160.
  - [157] N. Broy *et al.*, “A Cooperative In-Car Game for Heterogeneous Players,” pp. 167–174, 2011.
  - [158] N. Broy, M. Guo, S. Schneegass, B. Pfleging, and F. Alt, “Introducing Novel Technologies in the Car: Conducting a Real-world Study to Test 3D Dashboards,” in *Proceedings of the 7th International Conference on Automotive User Interfaces and Interactive Vehicular Applications*, 2015, pp. 179–186.
  - [159] F. Alt, S. Geiger, and W. Höhl, “ShapelineGuide: Teaching Mid-Air Gestures for Large Interactive Displays,” in *Proceedings of the 7th ACM International Symposium on Pervasive Displays*, 2018, pp. 3:1–3:8.
  - [160] N. Broy, B. J. Zierer, S. Schneegass, and F. Alt, “Exploring Virtual Depth for Automotive Instrument Cluster Concepts,” in *Proceedings of the Extended Abstracts of the 32Nd Annual ACM Conference on Human Factors in Computing Systems*, 2014, pp. 1783–1788.
  - [161] V. Broy and F. Althoff, “iFlip : A Metaphor for In-vehicle Information Systems,” pp. 155–158, 2006.
  - [162] M. Bub, E. Volynsky, and W. Wörndl, “User Acceptance of Proactive Recommendations on Smartphone and Smartwatch,” in *Adjunct Publication of the 26th Conference on User Modeling, Adaptation and Personalization*, 2018, pp. 143–150.
  - [163] M. Budde, A. Schankin, J. Hoffmann, M. Danz, T. Riedel, and M. Beigl, “Participatory Sensing or Participatory Nonsense?: Mitigating the Effect of Human Error on Data Quality in Citizen Science,” *Proc. ACM Interact. Mob. Wearable Ubiquitous Technol.*, vol. 1, no. 3, pp. 39:1–39:23, 2017.
  - [164] D. Buschek, M. Hassib, and F. Alt, “Personal Mobile Messaging in Context: Chat Augmentations for Expressiveness and Awareness,” *ACM Trans. Comput. Interact.*, vol. 25, no. 4, pp. 23:1–23:33, 2018.

- [165] D. Buschek, B. Roppelt, and F. Alt, "Extending Keyboard Shortcuts with Arm and Wrist Rotation Gestures," pp. 1–12, 2018.
- [166] S. Butscher, "InformationSense : Trade-offs for the Design and the Implementation of a Large Highly Deformable Cloth Display," vol. 1, no. 2, pp. 1–28, 2017.
- [167] J. Buur, "PAUSE : Exploring Mindful Touch Interaction on Smartphones," 2016.
- [168] T. Camacho, M. Foth, and M. Rittenbruch, "TrainYarn : Probing Perceptions of Social Space in Urban Commuter Trains," pp. 455–464, 2015.
- [169] S. Cano, J. M. Arteaga, C. A. Collazos, and V. B. Amador, "Model for Analysis of Serious Games for Literacy in Deaf Children from a User Experience Approach," in *Proceedings of the XVI International Conference on Human Computer Interaction*, 2015, pp. 18:1–18:9.
- [170] D. Anastasiou and E. Ras, "A Questionnaire-based Case Study on Feedback by a Tangible Interface," pp. 2015–2018, 2017.
- [171] S. Cano, C. A. Collazos, C. Manresa-Yee, and V. Peñeñory, "Principles of Design for Serious Games to Teaching of Literacy for Children with Hearing Disabilities," in *Proceedings of the XVII International Conference on Human Computer Interaction*, 2016, pp. 6:1–6:2.
- [172] B. Caramiaux, F. Bevilacqua, and A. Tanaka, "Beyond Recognition: Using Gesture Variation for Continuous Interaction," in *CHI '13 Extended Abstracts on Human Factors in Computing Systems*, 2013, pp. 2109–2118.
- [173] M. Chollet, C. Neubauer, and S. Scherer, "Influence of Individual Differences when Training Public Speaking with Virtual Audiences," pp. 1–7, 2018.
- [174] G. Christou, "([ SORULQJ 3OD \ HU 3HUFHSLRQV WKDW & RQWULEXWH WR WKH \$SSHDO RI : RUOG RI : DUFUDIW," vol. 3, pp. 6–9, 2012.
- [175] A. Colley, V. Inget, I. Rantala, and J. Häkklä, "Investigating Interaction with a Ring Form Factor," pp. 107–111.
- [176] B. Conradi *et al.*, "Flow of Electrons : An Augmented Workspace for Learning Physical Computing Experientially," 2011.
- [177] M. Daniel, G. Rivière, and N. Couture, "CairnFORM: A Shape-Changing Ring Chart Notifying Renewable Energy Availability in Peripheral Locations," in *Proceedings of the Thirteenth International Conference on Tangible, Embedded, and Embodied Interaction*, 2019, pp. 275–286.
- [178] N. E. Diana and O. A. Saputra, "Measuring user experience of a potential shipment tracking application," in *Proceedings of the International HCI and UX Conference in Indonesia on - CHIuXiD '15*, 2015.
- [179] T. Donkers and B. Loepp, "Tag-Enhanced Collaborative Filtering for Increasing Transparency and Interactive Control," pp. 169–173, 2016.
- [180] R. Ecker, V. Broy, A. Butz, and A. De Luca, "pieTouch : A Direct Touch Gesture Interface for Interacting with In-Vehicle Information Systems .," 2009.
- [181] E. Angulo, E.- Boadilla, M. Madrid, and X. Ferre, "A Case Study on Cross-Platform Development Frameworks for Mobile Applications and UX," 2014.
- [182] R. Ecker, V. Broy, and N. Joshi, "Toggle Strategies for the POI Selection via the iDrive Controller," in *Proceedings of the 1st International Conference on Automotive User Interfaces and Interactive Vehicular Applications*, 2009, pp. 71–74.
- [183] P. Ehrenbrink and S. Möller, "Google Now is for the Extraverted , Cortana for the Introverted : Investigating the Influence of Personality on IPA Preference .," pp. 257–265, 2017.
- [184] T. Enomoto, T. Martins, M. Otsuki, H. Iwata, and K. Suzuki, "Embodied interface for levitation and navigation in a 3D large space," 2001.
- [185] U. Experience *et al.*, "Social and Spatial Interactions : Shared Co-Located Mobile Phone Use," pp. 3223–3228, 2010.

- [186] T. Fastnacht, P. T. Fischer, E. Hornecker, S. Zierold, A. O. Aispuro, and J. Marschall, "The Hedonic Value of Sonnengarten: Touching Plants to Trigger Light," in *Proceedings of the 16th International Conference on Mobile and Ubiquitous Multimedia*, 2017, pp. 507–514.
- [187] T. Fechner, D. Schlarmann, and C. Kray, "Facilitating Citizen Engagement in Situ : Assessing the Impact of Pro-Active Geofenced Notifications," 2016.
- [188] S. Fernandes, A. Velhinho, and P. Almeida, "UI Design for an iTV platform : an iterative approach," pp. 1–8, 2018.
- [189] S. Fleck, C. Baraudon, L. Rochelle, and M. Hachet, "" Teegi ' s so Cute !": Assessing the Pedagogical Potential of an Interactive Tangible Interface for Schoolchildren," pp. 143–156, 2018.
- [190] J. Fortmann and B. Poppinga, "Real-Life Experiences with an Adaptive Light Bracelet," pp. 138–146, 2015.
- [191] J. Fortmann, E. Root, and S. Boll, "Tangible Apps Bracelet : Designing Modular Wrist-Worn Digital Jewellery for Multiple Purposes," pp. 841–852, 2016.
- [192] I. Aslan and E. André, "Pre-touch Proxemics : Moving the Design Space of Touch Targets from Still Graphics towards Proxemic Behaviors a ) b )," pp. 101–109, 2017.
- [193] J. Francone and L. Nigay, "Using the User ' s Point of View for Interaction on Mobile Devices," 2011.
- [194] A. Frank, F. Schneider, A. Meschtscherjakov, and J. Stadon, "Advanced Traffic Light Interface : Countdown Timers to Increase User Experience," 2015.
- [195] A.-K. Frison, P. Wintersberger, A. Riener, and C. Schartmüller, "Driving Hotzenplotz," in *Proceedings of the 9th International Conference on Automotive User Interfaces and Interactive Vehicular Applications - AutomotiveUI '17*, 2017.
- [196] T. Fröhlich, "Productivity & Play : A First-Person Shooter for Fast and Easy Scene Design," 2017.
- [197] A. Fuchs, M. Sturdee, and J. Sch, "FoldWatch : Using Origami-Inspired Paper Prototypes to Explore the Extension of Output Space in Smartwatches," 2015.
- [198] D. Furió, S. Fleck, B. Bousquet, J.-P. Guillet, L. Canioni, and M. Hachet, "HOBIT: Hybrid Optical Bench for Innovative Teaching," in *Proceedings of the 2017 CHI Conference on Human Factors in Computing Systems*, 2017, pp. 949–959.
- [199] I. Giannopoulos, P. Kiefer, and M. Raubal, "GazeNav : Gaze-Based Pedestrian Navigation," pp. 337–346, 2015.
- [200] P. Giraudeau, "Towards a Mixed-Reality Interface for Mind-Mapping," pp. 384–389.
- [201] A. Gkoumas, A. Komninos, and J. Garofalakis, "Usability of Visibly Adaptive Smartphone keyboard layouts."
- [202] B. Gnauk, L. Dannecker, and M. Hahmann, "Leveraging Gamification in Demand Dispatch Systems," in *Proceedings of the 2012 Joint EDBT/ICDT Workshops*, 2012, pp. 103–110.
- [203] I. Aslan, B. Bittner, F. Müller, E. André, I. Technique, and M. Gestures, "Exploring the User Experience of Proxemic Hand and Pen Input Above and Aside a Drawing Screen b )," pp. 183–192, 2018.
- [204] F. Göbel, P. Kiefer, I. Giannopoulos, A. T. Duchowski, and M. Raubal, "Improving Map Reading with Gaze-adaptive Legends," in *Proceedings of the 2018 ACM Symposium on Eye Tracking Research & Applications*, 2018, pp. 29:1–29:9.
- [205] S. Göbel, C. Geiger, C. Heinze, and D. Marinos, "Creating a Virtual Archery Experience," in *Proceedings of the International Conference on Advanced Visual Interfaces*, 2010, pp. 337–340.
- [206] B. Graf, M. Krüger, F. Müller, A. Ruhland, and A. Zech, "Nombot: Simplify Food Tracking," in *Proceedings of the 14th International Conference on Mobile and Ubiquitous Multimedia*, 2015, pp. 360–363.

- [207] P. Grau, B. Naderi, and J. Kim, "Personalized Motivation-supportive Messages for Increasing Participation in Crowd-civic Systems," *Proc. ACM Hum.-Comput. Interact.*, vol. 2, no. CSCW, pp. 60:1--60:22, 2018.
- [208] G. Gronier, "Measuring the First Impression : Testing the Validity of the 5 Second Test," vol. 12, no. 1, pp. 8–25, 2016.
- [209] J. Grubert, M. Heinisch, A. Quigley, and D. Schmalstieg, "MultiFi: Multi Fidelity Interaction with Displays On and Around the Body," in *Proceedings of the 33rd Annual ACM Conference on Human Factors in Computing Systems*, 2015, pp. 3933–3942.
- [210] B. Haas and F. Echtler, "Task Assignment and Visualization on Tabletops and Smartphones," in *Proceedings of the Ninth ACM International Conference on Interactive Tabletops and Surfaces*, 2014, pp. 311–316.
- [211] R. Haeuslschmid and M. Von Buelow, "Supporting Trust in Autonomous Driving," pp. 319–329, 2017.
- [212] J. Harms, D. Seitz, C. Wimmer, K. Kappel, and T. Grechenig, "Low-Cost Gamification of Online Surveys : Improving the User Experience through Achievement Badges," *CHI Play. Proc. 2nd ACM SIGCHI Annu. Symp. Comput. Interact. Play.*, pp. 109–113, 2015.
- [213] C. Harris, "Let ' s Walk at Work – Persuasion through the Brainwolk Walking Meeting App Full Paper Towards Physically Active Ways of Work."
- [214] I. Aslan, M. Dietz, and E. André, "Gazeover -- Exploring the UX of Gaze-triggered Affordance Communication for GUI Elements," in *Proceedings of the 20th ACM International Conference on Multimodal Interaction*, 2018, pp. 253–257.
- [215] B. Hatscher and C. Hansen, "Hand, Foot or Voice: Alternative Input Modalities for Touchless Interaction in the Medical Domain," in *Proceedings of the 20th ACM International Conference on Multimodal Interaction*, 2018, pp. 145–153.
- [216] R. Häuslschmid, B. Fritzsche, and A. Butz, "Can a Helmet-mounted Display Make Motorcycling Safer?," in *23rd International Conference on Intelligent User Interfaces*, 2018, pp. 467–476.
- [217] R. Häuslschmid, S. Osterwald, M. Lang, and A. Butz, "Augmenting the Driver ' s View with Peripheral Information on a Windshield Display," pp. 311–321, 2015.
- [218] M. Heintz and E. L. Law, "PDotCapturer and PDotAnalyser : Participatory Design Online Tools for Asynchronous Idea Capturing and Analysis," 2018.
- [219] S. Heintz and E. L. Law, "Digital Educational Games : Methodologies for Evaluating the Impact of Game Type," vol. 25, no. 2, 2018.
- [220] F. Hemmert, S. Hamann, D. T. Laboratories, J. Zeipelt, and G. Joost, "Weight-Shifting Mobiles : Two-Dimensional Gravitational Displays in Mobile Phones," pp. 3087–3091, 2010.
- [221] D. Herzog and W. Wolfgang, "RouteMe : A Mobile Recommender System for Personalized , Multi-Modal Route Planning," pp. 67–75, 2017.
- [222] A. Holzer, S. Govaerts, S. Bendahan, and D. Gillet, "Towards Mobile Blended Interaction Fostering Critical Thinking," in *Proceedings of the 17th International Conference on Human-Computer Interaction with Mobile Devices and Services Adjunct*, 2015, pp. 735–742.
- [223] A. Holzer, B. Kocher, D. Gillet, S. Bendahan, and B. Fritscher, "DinerRouge: Bringing Wealth and Income Inequality to the Table Through a Provocative UX," in *Proceedings of the 33rd Annual ACM Conference Extended Abstracts on Human Factors in Computing Systems*, 2015, pp. 2187–2192.
- [224] M. Hopmann, P. Salamin, N. Chauvin, F. Vexo, and D. Thalmann, "Natural Activation for Gesture Recognition Systems," in *CHI '11 Extended Abstracts on Human Factors in Computing Systems*, 2011, pp. 173–183.
- [225] I. Aslan, B. Weixelbaumer, B. Maurer, D. Wurhofer, A. Meschtscherjakov, and M. Tscheligi,

- "Sounds Like It Works: Music-based Navigation to Improve the Cleanroom Experience," in *Proceedings of the 33rd Annual ACM Conference Extended Abstracts on Human Factors in Computing Systems*, 2015, pp. 1657–1662.
- [226] J. Huber, J. Steimle, and M. Mühlhäuser, "Toward More Efficient User Interfaces for Mobile Video Browsing : An In-Depth Exploration of the Design Space," pp. 341–350, 2010.
  - [227] J. Hurtienne and D. Reinhardt, "Texture Metaphors and Tangible Interaction : No Smooth Relationship ?," pp. 79–87, 2017.
  - [228] H. H. Van Huysduynen *et al.*, "Ambient Light and its Influence on Driving Experience," pp. 293–301, 2017.
  - [229] J. Ichino, K. Isoda, A. Hanai, and T. Ueda, "Effects of the Display Angle in Museums on User ' s Cognition , Behavior , and Subjective Responses," pp. 2979–2988, 2013.
  - [230] J. H. Israel and K. Weber, "Cooking up Real World Business Applications Combining Physicality , Digitality , and Image Schemas," pp. 239–246, 2008.
  - [231] V. Von Jan, "Information Push and Pull in Tactile Pedestrian Navigation Support," pp. 55–62.
  - [232] T. Jokela and A. Lucero, "FlexiGroups : Binding Mobile Devices for Collaborative Interactions in Medium-Sized Groups with Device Touch," pp. 369–378, 2014.
  - [233] T. Jokela and A. Lucero, "A Comparative Evaluation of Touch-based Methods to Bind Mobile Devices for Collaborative Interactions," in *Proceedings of the SIGCHI Conference on Human Factors in Computing Systems*, 2013, pp. 3355–3364.
  - [234] T. Jokela *et al.*, "A Comparison of Methods to Move Visual Objects Between Personal Mobile Devices in Different Contexts of Use," pp. 172–181, 2015.
  - [235] P. Kaufmann, "Evaluation of Driving Performance and User Experience of Different Types of Speedometer," 2018.
  - [236] I. Seidinger and J. Grubert, "3D Character Customization for Non-Professional Users in Handheld Augmented Reality," *2016 IEEE Int. Symp. Mix. Augment. Real.*, pp. 129–134, 2016.
  - [237] D. Podbojec, B. Herynek, D. Jazbec, M. Cvetko, M. Debevc, and I. Kozuh, "3D-based location positioning using the Dew Computing approach for indoor navigation," in *2017 40th International Convention on Information and Communication Technology, Electronics and Microelectronics (MIPRO)*, 2017, pp. 393–398.
  - [238] P. Marti and I. Iacono, "Anticipated, momentary, episodic, remembered: the many facets of User eXperience," in *2016 Federated Conference on Computer Science and Information Systems (FedCSIS)*, 2016, pp. 1647–1655.
  - [239] G. Cordasco *et al.*, "Assessing Voice User Interfaces: The vassist system prototype," in *2014 5th IEEE Conference on Cognitive Infocommunications (CogInfoCom)*, 2014, pp. 91–96.
  - [240] C. Saul, "Assessment 3 . 0 meets Engineering Sciences," *2013 Int. Conf. Interact. Collab. Learn.*, no. September, pp. 623–630, 2013.
  - [241] L. Mart, S. Mendoza, and B. A. Gonz, "AUX and UX Evaluation of User Tools in Social Networks," pp. 104–111, 2018.
  - [242] R. Kr, U. Bechstedt, and A. Platz, "Can Twitter Really Save Your Life ? A Case Study of Visual Social Media Analytics for Situation Awareness," pp. 183–190, 2013.
  - [243] C. Study, "Case Study A User-Centered Design Approach to Self-Service Ticket Vending Machines," vol. 56, no. 2, pp. 138–159, 2013.
  - [244] K. Kammerer, J. Kolb, S. Ronis, and M. Reichert, "Collaborative Process Modeling with Tablets and Touch Tables — A Controlled Experiment," *2015 IEEE 9th Int. Conf. Res. Challenges Inf. Sci.*, pp. 31–41, 2015.
  - [245] S. Werrlich, A. Daniel, A. Ginger, P. Nguyen, and G. Notni, "Comparing HMD-Based and Paper-Based Training," in *2018 IEEE International Symposium on Mixed and Augmented Reality (ISMAR)*, 2018, pp. 134–142.

- [246] S. Pick, A. S. Puika, and T. W. Kuhlen, "Comparison of a Speech-Based and a Pie-Menu-Based Interaction Metaphor for Application Control," *2017 IEEE Virtual Real.*, pp. 381–382, 2017.
- [247] D. Krupke, F. Steinicke, P. Lubos, Y. Jonetzko, M. Görner, and J. Zhang, "Comparison of Multimodal Heading and Pointing Gestures for Co-Located Mixed Reality Human-Robot Interaction," in *2018 IEEE/RSJ International Conference on Intelligent Robots and Systems (IROS)*, 2018, pp. 1–9.
- [248] C. Peng, J. Hansberger, V. A. Shanthakumar, S. Meacham, V. Blakley, and L. Cao, "A Case Study of User Experience on Hand-Gesture Video Games," in *2018 IEEE Games, Entertainment, Media Conference (GEM)*, 2018, pp. 453–457.
- [249] S. Hoermann *et al.*, "Computerized mirror therapy with augmented reflection technology for stroke rehabilitation: A feasibility study in a rehabilitation center," in *International Conference on Virtual Rehabilitation, ICVR*, 2015, pp. 199–206.
- [250] A. Mewes, F. Heinrich, B. Hensen, F. Wacker, K. Lawonn, and C. Hansen, "Concepts for augmented reality visualisation to support needle guidance inside the MRI," *Healthc. Technol. Lett.*, vol. 5, no. 5, pp. 172–176, 2018.
- [251] S. Pick, B. Weyers, B. Hentschel, and T. W. Kuhlen, "Design and Evaluation of Data Annotation Workflows for CAVE-like Virtual Environments," *IEEE Trans. Vis. Comput. Graph.*, vol. 22, no. 4, pp. 1452–1461, 2016.
- [252] G. Caggianese, L. Gallo, and G. De Pietro, "Design and preliminary evaluation of a touchless interface for manipulating virtual heritage artefacts," *2014 Tenth Int. Conf. Signal-Image Technol. Internet-Based Syst.*, pp. 493–500, 2014.
- [253] K. Engelbrecht, S. Schmiedeke, M. Quade, and S. Möller, "Designing New Experiences in the Smart Home: Multi-camera Person Localization Framework to Document Predefined Situations," in *2015 International Conference on Intelligent Environments*, 2015, pp. 1–8.
- [254] C. Pohlt, F. Haubner, J. Lang, S. Rochholz, T. Schlegl, and S. Wachsmuth, "Effects on User Experience During Human-Robot Collaboration in Industrial Scenarios," in *2018 IEEE International Conference on Systems, Man, and Cybernetics (SMC)*, 2018, pp. 837–842.
- [255] V. Khan, M. Pekelharing, and N. Desle, "Efficient navigation in virtual environments: A comparative study of two interaction techniques: The Magic Wand vs. the Human Joystick," in *2012 4th International Conference on Intelligent Human Computer Interaction (IHCI)*, 2012, pp. 1–5.
- [256] L. Hagedorn, T. Buchert, and R. Stark, "Empirical study on aesthetics as an influencing factor on sustainability," in *2017 International Conference on Engineering, Technology and Innovation (ICE/ITMC)*, 2017, pp. 776–783.
- [257] S. K. Sathish, A. Patankar, and N. Priyodit, "Enabling Multi-Topic and Cross-Language Browsing Using Web-Semantics Service," in *2017 IEEE International Conference on Web Services (ICWS)*, 2017, pp. 644–651.
- [258] A. Miclaus, T. Riedel, and M. Beigl, "End-user installation of heterogeneous home automation systems using pen and paper interfaces and dynamically generated documentation," in *2014 International Conference on the Internet of Things (IOT)*, 2014, pp. 19–24.
- [259] M. Rüdél, J. Ganser, and R. Koschke, "A Controlled Experiment on Spatial Orientation in VR-Based Software Cities," in *2018 IEEE Working Conference on Software Visualization (VISSOFT)*, 2018, pp. 21–31.
- [260] S. Schaffer and M. Minge, "Error-prone Voice and Graphical User Interfaces in a Mobile Application 1 Introduction 2 Study," pp. 26–29, 2012.
- [261] C. Trahms and M. Sebastian, "Estimating Quality Ratings from Touch Interactions in Mobile Games," pp. 1–6, 2018.
- [262] I. Wechsung and A. B. Naumann, "Evaluating a multimodal remote control: The interplay

between user experience and usability,” in *2009 International Workshop on Quality of Multimedia Experience*, 2009, pp. 19–22.

- [263] A. Habibovic, J. Andersson, M. Nilsson, V. M. Lundgren, and J. Nilsson, “Evaluating Interactions with Non-existing Automated Vehicles: Three Wizard of Oz Approaches,” *2016 IEEE Intell. Veh. Symp.*, no. Iv, pp. 32–37, 2016.
- [264] M. Hoda, R. Alattas, and A. E. Saddik, “Evaluating Player Experience in Cycling Exergames,” in *2013 IEEE International Symposium on Multimedia*, 2013, pp. 415–420.
- [265] N. Putu Indah Rosita Devy, S. Wibirama, and P. Insap Santosa, *Evaluating User Experience of English Learning Interface using User Experience Questionnaire and System Usability Scale*. 2017.
- [266] P. V. Yulianandra, S. Wibirama, and P. I. Santosa, “Examining the effect of website complexity and task complexity in web-based learning management system,” in *Proceedings - 2017 1st International Conference on Informatics and Computational Sciences, ICICoS 2017*, 2018.
- [267] G. Peedu and D. Lamas, “Exploring the effects of enabling Web 2.0 in e-government services,” in *2011 IEEE International Conference on Information Reuse Integration*, 2011, pp. 507–512.
- [268] M. Wirth *et al.*, “Exploring the Feasibility of EMG Based Interaction for Assessing Cognitive Capacity in Virtual Reality,” vol. 1, pp. 4953–4956, 2018.
- [269] S. Möller, T. Westermann, J. Beyer, and R. Reichmuth, “Exploring User Behavior and Preferences in the Wild with Mobile Apps Lessons Learned from Four Case Studies,” 2014.
- [270] K. Norman, “A Model Driven Approach for Eased Knowledge Storage and Retrieval in Interactive HRI Systems,” 2018.
- [271] L. Dorcec, D. Pevec, H. Vdovic, J. Babic, and V. Podobnik, “Exploring Willingness to Pay for Electric Vehicle Charging with Gamified Survey,”
- [272] O. Parra, S. España, and J. I. Panach, “Extending and validating gestUI using Technical Action Research,” *2017 11th Int. Conf. Res. Challenges Inf. Sci.*, no. Mdd, pp. 341–352, 2017.
- [273] S. Eroglu, S. Gebhardt, P. Schmitz, D. Rausch, and T. W. Kuhlen, “Fluid Sketching — Immersive Sketching Based on Fluid Flow,” *2018 IEEE Conf. Virtual Real. 3D User Interfaces*, pp. 475–482.
- [274] M. Xenos, “Game-Based Learning Using a 3D Virtual World in Computer Engineering Education,” *2017 IEEE Glob. Eng. Educ. Conf.*, no. April, pp. 1078–1083, 2017.
- [275] M. Süncksen, H. Bendig, M. Teistler, M. Wagner, O. J. Bott, and K. Dresing, “Gamification and virtual reality for teaching mobile x-ray imaging,” 2018.
- [276] T. Poitschke, F. Laquai, S. Stamboliev, and G. Rigoll, “Gaze-based interaction on multiple displays in an automotive environment,” in *2011 IEEE International Conference on Systems, Man, and Cybernetics*, 2011, pp. 543–548.
- [277] M. Richard, “How to Master Challenges in Experimental Evaluation of 2D versus 3D Software Visualizations,” pp. 33–36, 2014.
- [278] M. Dolata, N. Jeners, and W. Prinz, “How to tag it right? Semi-automatic support for email management,” *9th IEEE Int. Conf. Collab. Comput. Networking, Appl. Work.*, pp. 515–524, 2013.
- [279] N. Hamzeheinejad, S. Straka, D. Gall, F. Weillbach, and M. E. Latoschik, “Immersive Robot-Assisted Virtual Reality Therapy for Neurologically-Caused Gait Impairments,” *2018 IEEE Conf. Virtual Real. 3D User Interfaces*, pp. 565–566, 2018.
- [280] C. Staub, S. Can, A. Knoll, V. Nitsch, I. Karl, and B. Farber, “Implementation and evaluation of a gesture-based input method in robotic surgery,” *HAVE 2011 - IEEE Int. Symp. Haptic Audio-v. Environ. Games, Proc.*, pp. 1–7, 2011.
- [281] T. Giesbrecht, J. Pfister, and G. Schwabe, “A Self-Determination Perspective on IT-based Citizen Advisory Support,” *2012 45th Hawaii Int. Conf. Syst. Sci.*, pp. 2501–2510, 2012.
- [282] H. Ge, T. Hamada, T. Sumitomo, and N. Koshizuka, “Intellevator: A Context-Aware Elevator System for Assisting Passengers,” in *2018 IEEE 16th International Conference on Embedded and*

*Ubiquitous Computing (EUC)*, 2018, pp. 81–88.

- [283] S. R. Garzon, "Intelligent in-car-infotainment systems: A contextual personalized approach," *Proc. - 8th Int. Conf. Intell. Environ. IE 2012*, pp. 315–318, 2012.
- [284] P. F. Larasati, "Interaction Design Evaluation and Improvements of Cozora – A Synchronous and Asynchronous Online Learning Application," *2017 7th World Eng. Educ. Forum*, pp. 536–541, 2017.
- [285] L. Mottola *et al.*, "make Sense : Simplifying the Integration of Wireless Sensor Networks into Business Processes," vol. 258351, no. c, pp. 1–19, 2017.
- [286] S. Franken, W. Prinz, S. Augustin, N. Jeners, and L. Informatik, "Making Groupware Social The Case of a Cooperative Platform for Surgeons," *2014 Int. Conf. Intell. Netw. Collab. Syst.*, pp. 49–56, 2014.
- [287] T. Y. Wang and C. H. Wang, "Materials Based on User Experience," *2018 1st Int. Cogn. Cities Conf.*, pp. 123–128, 2018.
- [288] E. Maggioni, E. Agostinelli, and M. Obrist, "Measuring the Added Value of Haptic Feedback," *2017 Ninth Int. Conf. Qual. Multimed. Exp.*, pp. 1–6, 2017.
- [289] R. K. Paredes and A. A. Hernandez, *Measuring the Quality of User Experience on Web Services: A Case of University in the Philippines. .*
- [290] D. S. Pradana and R. Ferdiana, "Mobile Applications Rating Assessments Based on Users Experience Perception," no. November, pp. 175–179, 2014.
- [291] A. Hartl and J. Grubert, "Mobile Interactive Hologram Verification," *2013 IEEE Int. Symp. Mix. Augment. Real.*, no. October, pp. 75–82, 2013.
- [292] B. Byl, M. Sünksen, and M. Teistler, "A serious virtual reality game to train spatial cognition for medical ultrasound imaging," in *2018 IEEE 6th International Conference on Serious Games and Applications for Health, SeGAH 2018*, 2018, pp. 1–4.
- [293] D. Sobnath, N. Philip, R. Kayyali, B. Pierscionek, and A. Raptopoulos, "Mobile Self-Management Application for COPD Patients with Comorbidities : a Usability Study," *2016 IEEE 18th Int. Conf. e-Health Networking, Appl. Serv.*, pp. 1–6, 2016.
- [294] A. Hartl, J. Grubert, C. Reinbacher, C. Arth, and D. Schmalstieg, "Mobile User Interfaces for Efficient Verification of Holograms," pp. 119–126.
- [295] I. Wechsung and R. Schleicher, "Modelling Modality Choice Using Task Parameters and Perceived Quality 1 Introduction 2 Method 3 Results," pp. 26–29, 2012.
- [296] J. C. B. Lopez and C. Vilela-malabanan, "Multi-Postural Myoelectric Control of 3D-Printed Transradial Prosthesis," 2017.
- [297] M. K. Gf and L. Ak, "No Title," pp. 1–4, 2015.
- [298] R. Baranyi, B. Steyrer, L. Lechner, G. N. Agbektas, N. Lederer, and T. Grechenig, "NutritionRush - A Serious Game to Support People with the Awareness of Their Nutrition Intake," *2017 IEEE 5th Int. Conf. Serious Games Appl. Heal.*, pp. 1–8, 2020.
- [299] P. A. Kara, A. Cserkaszkzy, S. Darukumalli, A. Barsi, and M. G. Martini, "On the Edge of the Seat : Reduced Angular Resolution of a Light Field Cinema with Fixed Observer Positions," *2017 Ninth Int. Conf. Qual. Multimed. Exp.*, pp. 1–6, 2017.
- [300] O. Kuzmicheva *et al.*, "Overground Robot Based Gait Rehabilitation System MOPASS – Overview and First Results from Usability Testing \*," pp. 3756–3763, 2016.
- [301] K. Yannick, M. Feld, and T. Schwartz, "Pervasive Audio Playback in Cyber-Physical Environments," no. September, 2017.
- [302] J. Blume, A. Bannat, and G. Rigoll, "Programming Concept for an Industrial HRI Packaging Cell," *2013 IEEE RO-MAN*, pp. 93–98, 2013.
- [303] G. Fico, A. Fioravanti, M. T. Arredondo, J. Leuteritz, and D. Fernandez, "A User Centered Design Approach for Patient Interfaces to a Diabetes IT Platform," pp. 1169–1172, 2011.

- [304] A. Baharum *et al.*, "Releasing Stress Using Music Mood Application : DeMuse," pp. 351–356, 2017.
- [305] H. B. Santoso, R. Y. K. Isal, T. Basaruddin, L. Sadita, and M. Schrepp, "Research-in-progress: User experience evaluation of Student Centered E-Learning Environment for computer science program," in *2014 3rd International Conference on User Science and Engineering (i-USer)*, 2014, pp. 52–55.
- [306] L. M. Queiros, N. C. Jofilsan, A. S. Gomes, F. K. De Oliveira, and A. S. C. Filho, "Services," 2018.
- [307] A. Bigdelou, T. Benz, and N. Navab, "Simultaneous Categorical and Spatio-Temporal 3D Gestures Using Kinect," *2012 IEEE Symp. 3D User Interfaces*, pp. 53–60.
- [308] M. Pivac and A. Granic, "Storytelling in web design: A case study," in *2017 40th International Convention on Information and Communication Technology, Electronics and Microelectronics (MIPRO)*, 2017, pp. 1540–1545.
- [309] C. Schl, A. Harrer, and A. Kienle, "Supporting dyadic chat communication with eye tracking based reading awareness," pp. 0–2, 2018.
- [310] S. Pick, A. S. Puika, and T. W. Kuhlen, "SWIFTER : Design and Evaluation of a Speech-based Text Input Metaphor for Immersive Virtual Environments," *2016 IEEE Symp. 3D User Interfaces*, pp. 109–112, 2016.
- [311] I. Hidayah, T. B. Adji, N. A. Setiawan, S. Fauziati, R. Hartanto, and M. A. Gumilang, "System : A Case in Algorithm and Data Structure Course," *2018 10th Int. Conf. Inf. Technol. Electr. Eng.*, pp. 301–306, 2018.
- [312] D. Reich and R. Stark, "The Influence of Immersive Driving Environments on Human-Cockpit Evaluations," in *2015 48th Hawaii International Conference on System Sciences*, 2015, pp. 523–532.
- [313] H. B. Santoso, S. Fadhilah, I. Nurrohmah, and W. H. Goodridge, "The usability and user experience evaluation of web-based online self-monitoring tool: Case study human-computer interaction course," in *2016 4th International Conference on User Science and Engineering (i-USer)*, 2016, pp. 122–127.
- [314] L. Phiri, C. Meinel, and H. Suleman, "Ad hoc vs . Organised Orchestration : A Comparative Analysis of Technology-driven Orchestration Approaches," *2016 IEEE Eighth Int. Conf. Technol. Educ.*, pp. 200–203, 2016.
- [315] I. Ivkic, M. G. Tauber, and A. Wöhrer, "Towards Comparing Programming Paradigms," pp. 436–437, 2017.
- [316] A. Tervakari, "Towards More Authentic Learning in Hypermedia," *2011 IEEE Glob. Eng. Educ. Conf.*, pp. 443–449, 2011.
- [317] L. Lo Iacono, H. V. Nguyen, T. Hirsch, M. Baiers, and M. Sebastian, "UI-Dressing to detect Phishing," 2014.
- [318] P. Rasche, M. Wille, S. Theis, K. Schäfer, C. M. Schlick, and A. Mertens, "Usability and Motivation of Mobile Healthcare in the context of Elderly People," 2015.
- [319] N. Brancati, G. Caggianese, G. D. Pietro, M. Frucci, L. Gallo, and P. Neroni, "Usability Evaluation of a Wearable Augmented Reality System for the Enjoyment of the Cultural Heritage," in *2015 11th International Conference on Signal-Image Technology Internet-Based Systems (SITIS)*, 2015, pp. 768–774.
- [320] J. Habakuk and J. Neumann, "Usability of Hybrid , Physical and Virtual Objects for Basic Manipulation Tasks in Virtual Environments," pp. 87–94.
- [321] A. Weiss, R. Bernhaupt, D. Schwaiger, M. Altmaninger, R. Buchner, and M. Tscheligi, "User experience evaluation with a Wizard of Oz approach: Technical and methodological considerations," in *2009 9th IEEE-RAS International Conference on Humanoid Robots*, 2009, pp. 303–308.

- [322] N. Ibrahim, W. Fatimah, W. Ahmad, and A. Shafie, "User Experience Study on Folktales Mobile Application for Children's Education," in *2015 9th International Conference on Next Generation Mobile Applications, Services and Technologies*, 2015, pp. 353–358.
- [323] M. Pratama, N. A. Setiawan, and S. Wibirama, "User interface design for android-based family genealogy social media," in *2017 7th International Annual Engineering Seminar (InAES)*, 2017, pp. 1–5.
- [324] M. Schmargendorf, B. Wrede, and T. Schlegl, "User-Centered Design of Multimodal Robot Feedback for Cobots of Human-Robot Working Cells in Industrial Production Contexts," pp. 442–449, 2018.
- [325] C. Meurisch *et al.*, "An Extensible Pervasive Platform for Large-Scale Anticipatory Mobile Computing," in *2017 IEEE 41st Annual Computer Software and Applications Conference (COMPSAC)*, 2017, vol. 1, pp. 459–464.
- [326] L. Mart, S. Mendoza, and B. A. Gonz, "UX Evaluation Over Time: User Tools in Social Networks," 2018.
- [327] M. R. Reisinger, J. Schrammel, and P. Fröhlich, "Visual Languages for Smart Spaces: End-User Programming between Data-Flow and Form-Filling," no. 695965, pp. 165–169, 2020.
- [328] S. Gradl, M. Wirth, T. Zillig, and B. M. Eskofier, "Visualization of heart activity in virtual reality: A biofeedback application using wearable sensors," in *2018 IEEE 15th International Conference on Wearable and Implantable Body Sensor Networks (BSN)*, 2018, pp. 152–155.
- [329] W. N. Hidayat, S. C. Putro, M. A. Gumilang, and I. Hidayah, "What is Informatics Education Students' Impression of Using Metacognitive Training System at The First Time?," in *2018 International Conference on Advanced Computer Science and Information Systems (ICACSIS)*, 2018, pp. 213–218.
- [330] N. Broy, M. Nefzger, F. Alt, M. Hassib, and A. Schimdt, "3D-HUDD - Developing a Prototyping Tool for 3D Head-Up Displays," *Human-Computer Interact. – INTERACT 2015. INTERACT 2015. Lect. Notes Comput. Sci. vol 9299. Springer, Cham*, vol. 9299, pp. 300–318, 2015.
- [331] M. Ebner, C. Stickel, N. Scerbakov, and A. Holzinger, "A study on the compatibility of ubiquitous learning (u-Learning) systems at university level," *Lect. Notes Comput. Sci. (including Subser. Lect. Notes Artif. Intell. Lect. Notes Bioinformatics)*, vol. 5616 LNCS, no. PART 3, pp. 34–43, 2009.
- [332] A. H. Hoppe, K. Westerkamp, S. Maier, F. Van De Camp, and R. Stiefelhagen, "Multi-user Collaboration on Complex Data in Virtual and Augmented Reality," *HCI Int. 2018 – Posters' Ext. Abstr.*, vol. 850, pp. 258–265, 2018.
- [333] M. Schreiber, M. Von Wilamowitz-Moellendorff, and R. Bruder, "New Interaction Concepts by Using the Wii Remote," *Lect. Notes Comput. Sci. (including Subser. Lect. Notes Artif. Intell. Lect. Notes Bioinformatics)*, vol. 5611 LNCS, no. PART 2, pp. 261–270, 2009.
- [334] Á. Suárez, S. Ternier, F. Prinsen, and M. Specht, "Nurturing Communities of Inquiry: A Formative Study of the DoJoIBL Platform Ángel," vol. 9891, pp. 292–305, 2016.
- [335] L. Kraus, R. Schmidt, M. W. B, F. Schaub, and M. Sebastian, "On the Use of Emojis in Mobile Authentication," *ICT Syst. Secur. Priv. Prot.*, vol. 502, pp. 265–280, 2017.
- [336] J. Rivera, C. Gooble, D. Sardari, and H.-A. Jacobsen, "OpenGridMap: An Open Platform for Inferring Power Grids with Crowdsourced Data," *Lect. Notes Comput. Sci. (including Subser. Lect. Notes Artif. Intell. Lect. Notes Bioinformatics)*, vol. 9424, pp. 179–191, 2015.
- [337] A. Groth and D. Haslwanter, "Perceived Usability, Attractiveness and Intuitiveness of Responsive Mobile Tourism Websites: A User Experience Study," pp. 593–606, 2015.
- [338] A. Henka and G. Zimmermann, "PersonaBrowser Status Quo and Lessons Learned from a Persona-Based Presentation Metaphor of WCAG," *Human-Computer Interact. INTERACT '2017*, vol. 10514, pp. 54–63, 2017.

- [339] G. Waltner *et al.*, "Personalized Dietary Self-Management Using Mobile Vision-Based Assistance," *New Trends Image Anal. Process. – ICIAP 2013*, vol. 10590, pp. 385–393, 2017.
- [340] F. Hertlein, B. Hinterleitner, M. Voit, T. Schneidermeier, and C. Wolff, "Practice What We Preach – Checking the Usability of HCI Conference Websites," *Des. User Exp. Usability Des. Discourse*, vol. 9186, pp. 295–305, 2015.
- [341] R. H. B. C. Klaus, and A. Butz, "Presenting Information on the Driver's Demand on a Head-Up Display," *Human-Computer Interact. INTERACT '2017*, vol. 10514, pp. 245–262, 2017.
- [342] J. Abreu, P. Almeida, and T. Silva, "A UX evaluation approach for second-screen applications," in *Communications in Computer and Information Science*, 2016.
- [343] J. Hurtienne, K. Weber, and L. Blessing, "Prior Experience and Intuitive Use: Image Schemas in User Centred Design," *Des. Incl. Futur.*, pp. 107–116, 2008.
- [344] C. Bier, K. Kay, and J. Beyerer, "PrivacyInsight: The Next Generation Privacy Dashboard," *Priv. Technol. Policy*, vol. 9857, pp. 135–152, 2016.
- [345] A. Hoppe, L. Otto, F. van de Camp, R. Stiefelhagen, and G. Unmüßig, "qVRty: Virtual Keyboard with a Haptic, Real-World Representation," *HCI Int. 2018 – Posters' Ext. Abstr.*, vol. 851, pp. 266–272, 2018.
- [346] F. Metze, I. Wechsung, S. Schaffer, J. Seebode, and S. Möller, "Reliable evaluation of multimodal dialogue systems," *Lect. Notes Comput. Sci. (including Subser. Lect. Notes Artif. Intell. Lect. Notes Bioinformatics)*, vol. 5611 LNCS, no. PART 2, pp. 75–83, 2009.
- [347] A. Attenberger and K. Buchenrieder, "RemoteHand: A wireless myoelectric interface," *Lect. Notes Comput. Sci. (including Subser. Lect. Notes Artif. Intell. Lect. Notes Bioinformatics)*, vol. 8511 LNCS, no. PART 2, pp. 3–11, 2014.
- [348] P. L. Mateo Navarro, S. Hillmann, S. Möller, D. Sevilla Ruiz, and G. Martínez Pérez, "Run-time model based framework for automatic evaluation of multimodal interfaces," *J. Multimodal User Interfaces*, vol. 8, no. 4, pp. 399–427, 2014.
- [349] N. Le, S. Niebuhr, D. Drexler, and N. Pinkwart, "Scaffolding Computer Supported Argumentation Processes through Mini Map Based Interaction Techniques," *Int. Conf. Des. User Exp. Usability*, vol. 8015, pp. 533–542, 2013.
- [350] C. Zagel, A. Piazza, Y. Petrov, and F. Bodendorf, "SciencOmat: A Gamified Research Platform for Evaluating Visual Attractiveness," *Adv. Hum. Side Serv. Eng.*, vol. 601, pp. 50–60, 2018.
- [351] C. Hummels, "Searching for Salient Aspects of Resonant Interaction," *Knowledge, Technol. Policy*, vol. 20, no. 1, pp. 19–29, 2007.
- [352] P. Bader *et al.*, "Self-Actuated Displays for Vertical Surface," *Lect. Notes Comput. Sci. (including Subser. Lect. Notes Artif. Intell. Lect. Notes Bioinformatics)*, vol. 9299, pp. 282–299, 2015.
- [353] J. Holm and A. Lehtiniemi, "A Virtual World Prototype for Interacting with a Music Collection," pp. 326–335, 2011.
- [354] M. Mast *et al.*, "Semi-Autonomous Domestic Service Robots: Evaluation of a User Interface for Remote Manipulation and Navigation With Focus on Effects of Stereoscopic Display," *Int. J. Soc. Robot.*, vol. 7, no. 2, pp. 183–202, 2015.
- [355] N. Backhaus, A. K. Trapp, and M. Thüring, "Skeuomorph versus flat design: User experience and age-related preferences," *Lect. Notes Comput. Sci. (including Subser. Lect. Notes Artif. Intell. Lect. Notes Bioinformatics)*, vol. 10919 LNCS, pp. 527–542, 2018.
- [356] D. Pietschmann and P. Ohler, "Spatial Mapping of Physical and Virtual Spaces as an Extension of Natural Mapping: Relevance for Interaction Design and User Experience," *Lect. Notes Comput. Sci. (including Subser. Lect. Notes Artif. Intell. Lect. Notes Bioinformatics)*, vol. 9179, pp. 49–59, 2015.
- [357] K. Kohler, S. Niebuhr, and M. Hassenzahl, "Stay on the Ball ! An Interaction Pattern Approach to the 2 An Example : The Task Status Display," *Ifip Int. Fed. Inf. Process.*, pp. 519–522, 2007.

- [358] G. Cajamarca, I. Rodr, and V. H. B, "StraightenUp: Implementation and Evaluation of a Spine Posture Wearable," *Ubiquitous Comput. Ambient Intell.*, vol. 10586, pp. 655–665, 2017.
- [359] G. Bal, K. Rannenber, and J. Hong, "Styx: Design and Evaluation of a New Privacy Risk Communication Method for Smartphones," no. 2005, pp. 113–126, 2014.
- [360] M. Krause and K. Bengler, "Subjective Ratings in an Ergonomic Engineering Process Using the Example of an In-Vehicle Information System," 2013.
- [361] J. van Erp, A. Toet, K. Meijer, J. Jansen, and A. de Joung, "Subjective User Experience and Performance with Active Tangibles on a Tabletop Interface," *Lect. Notes Comput. Sci. (including Subser. Lect. Notes Artif. Intell. Lect. Notes Bioinformatics)*, vol. 9189, pp. 212–223, 2015.
- [362] O. Parra, S. Espa, and O. Pastor, "Tailoring User Interfaces to Include Gesture-Based Interaction with gestUI Otto," *Monogr. Soc. Res. Child Dev.*, vol. 9974, pp. 496–504, 2016.
- [363] F. Nothdurft, F. Honold, and W. Minker, "Temporal and Spatial Design of Explanations in a Multimodal System," *Human-Computer Interact. Interact. Platforms Tech.*, vol. 9732, pp. 201–210, 2016.
- [364] A. Steinert, I. Buchem, A. Merceron, J. Kreutel, and M. Haesner, "A wearable-enhanced fitness program for older adults, combining fitness trackers and gamification elements: the pilot study fMOOC@Home," *Sport Sci. Health*, vol. 14, no. 2, pp. 275–282, 2018.
- [365] M. Stecher, B. Michel, and A. Zimmermann, "The Benefit of Touchless Gesture Control: An Empirical Evaluation of Commercial Vehicle-Related Use Cases," *Adv. Hum. Asp. Transp.*, vol. 597, 2018.
- [366] H. Lang, M. Klepsch, F. Nothdurft, T. Seufert, and W. Minker, "The influence of proactivity on interactive help agents," *Lect. Notes Comput. Sci. (including Subser. Lect. Notes Artif. Intell. Lect. Notes Bioinformatics)*, vol. 7946 LNCS, pp. 748–767, 2013.
- [367] I. Wechsung, A. Naumann, and S. Möller, "The influence of the usage mode on subjectively perceived quality," *Lect. Notes Comput. Sci. (including Subser. Lect. Notes Artif. Intell. Lect. Notes Bioinformatics)*, vol. 6392 LNAI, pp. 188–193, 2010.
- [368] G. Behnke *et al.*, "To Plan for the User Is to Plan with the User: Integrating User Interaction into the Planning Process," *Companion Technol.*, pp. 123–144, 2017.
- [369] M. E. Altinsoy and S. Merchel, "Touchscreens and Musical Interaction," pp. 239–255, 2018.
- [370] B. Meixner, K. Matusik, C. Grill, and H. Kosch, "Towards an easy to use authoring tool for interactive non-linear video," *Multimed. Tools Appl.*, vol. 70, no. 2, pp. 1251–1276, 2014.
- [371] D. López-de-ipiña, M. Emaldi, U. Aguilera, and J. Pérez-velasco, "Towards Citizen Co-created Public Service Apps," *Ubiquitous Comput. Ambient Intell.*, vol. 10070, pp. 469–481, 2016.
- [372] C. Trahms, S. Möller, and J. Voigt-Antons, "Towards Prediction of User Experience from Touch Interactions with Mobile Applications," *HCI Int. 2018 – Posters' Ext. Abstr.*, vol. 714, pp. 505–512, 2017.
- [373] A. Bigdelou, A. Okur, M. E. Hoffmann, B. Azizi, and N. Navab, "Towards systematic usability evaluations for the OR: An introduction to OR-use framework," *Lect. Notes Comput. Sci. (including Subser. Lect. Notes Artif. Intell. Lect. Notes Bioinformatics)*, vol. 7330 LNCS, pp. 146–156, 2012.
- [374] I. TOTZKE, F. NAUJOKS, D. MÜHLBACHER, and H.-P. KRÜGER, "Training of coordinated driving in traffic In order to test Car-to-X Technologies," *ATZ Worldw. eMagazine*, vol. 113, no. 5, pp. 58–62, 2011.
- [375] A. Steinert, M. Haesner, and E. Steinhagen-Thiessen, "Activity-tracking devices for older adults: comparison and preferences," *Univers. Access Inf. Soc.*, vol. 17, no. 2, pp. 411–419, 2018.
- [376] R. Bernhaupt, A. Desnos, M. Pirker, and D. Schwaiger, "TV Interaction Beyond the Button Press Exploring the Implications of Gesture, Pressure and Breath as Interaction Mechanisms for a TV User Interface," *Lect. Notes Comput. Sci. (including Subser. Lect. Notes Artif. Intell. Lect.*

*Notes Bioinformatics*), vol. 9297, pp. 412–419, 2015.

- [377] G. Gonçalves, É. Mourao, L. Torok, D. Trevisan, E. Clua, and A. Montenegro, “Understanding User Experience with Game Controllers: A Case Study with an Adaptive Smart Controller and a Traditional Gamepad Guilherme,” *Lect. Notes Comput. Sci. (including Subser. Lect. Notes Artif. Intell. Lect. Notes Bioinformatics)*, vol. 10507, pp. 59–71, 2017.
- [378] F. Raber and N. Vossebein, “URetail: Privacy User Interfaces for Intelligent Retail Stores,” *Lect. Notes Comput. Sci. (including Subser. Lect. Notes Artif. Intell. Lect. Notes Bioinformatics)*, vol. 10516 LNCS, pp. 437–477, 2017.
- [379] M. Obrist, S. Kepplinger, E. Beck, M. Tscheligi, and P. Muzak, “Usability & user experience: Preliminary results from evaluating an IPTV community platform,” *Lect. Notes Comput. Sci. (including Subser. Lect. Notes Artif. Intell. Lect. Notes Bioinformatics)*, vol. 5066 LNCS, no. November 2007, pp. 303–307, 2008.
- [380] E. Faliagka, E. Lalou, M. Rigou, and S. Sirmakessis, “Usability and Aesthetics: The Case of Architectural Websites,” *Lect. Notes Comput. Sci. (including Subser. Lect. Notes Artif. Intell. Lect. Notes Bioinformatics)*, vol. 9171, pp. 54–64, 2015.
- [381] I. Wechsung, K. P. Engelbrecht, S. Schaffer, J. Seebode, F. Metze, and S. Möller, “Usability evaluation of multimodal interfaces: Is the whole the sum of its parts?,” *Lect. Notes Comput. Sci. (including Subser. Lect. Notes Artif. Intell. Lect. Notes Bioinformatics)*, vol. 5611 LNCS, no. PART 2, pp. 113–119, 2009.
- [382] A. Komninos, J. Besharat, and J. Garofalakis, “Use of Self-Reporting Questionnaires to Evaluate Augmented Paper Maps for Group Navigation,” *Ambient Intell.*, vol. 9425, pp. 125–137, 2005.
- [383] D. Drouet and R. Bernhaupt, “User Experience Evaluation Methods: Lessons Learned from an Interactive TV Case-Study,” 2016.
- [384] A. Smyth, C. Syrek, J. A. Reins, M. Domin, M. Janneck, and D. Lehr, “User experience predicts the effectiveness of a gamified recovery app: Investigation of Holidaily—an app promoting recovery behavior after vacation and during daily working life,” *Pravention und Gesundheitsforderung*, vol. 13, no. 4, pp. 319–326, 2018.
- [385] E. Reponen, J. Keränen, and V. Aaltonen, “User interface for browsing geotagged data - Design and evaluation,” *Lect. Notes Inst. Comput. Sci. Soc. Telecommun. Eng.*, vol. 78 LNICST, pp. 1–11, 2012.
- [386] K. Bang, M. Akto, A. Kjems, and J. Stage, “Adoption of UX Evaluation in Practice: An Action Research Study in a Software Organization,” *Lect. Notes Comput. Sci. (including Subser. Lect. Notes Artif. Intell. Lect. Notes Bioinformatics)*, vol. 10516, pp. 169–188, 2017.
- [387] F. Nothdurft, P. Bercher, G. Behnke, and W. Minker, “User Involvement in Collaborative Decision-Making Dialog Systems,” *Dialogues with Soc. Robot.*, vol. 427, 2017.
- [388] R. Klaassen, R. op den Akker, T. Lavrysen, and S. van Wissen, “User preferences for multi-device context-aware feedback in a digital coaching system,” *J. Multimodal User Interfaces*, vol. 7, no. 3, pp. 247–267, 2013.
- [389] R. Bernhaupt, P. Palanque, F. Manciet, and C. Martinie, “User-Test Results Injection into Task-Based Design Process for the Assessment and Improvement of Both Usability and User Experience,” *Human-Centered Error-Resilient Syst. Dev.*, vol. 9856, no. 2, pp. 56–72, 2016.
- [390] L. Yao, Y. Liu, W. Li, L. Zhou, and Y. Ge, “Using Physiological Measures to Evaluate User Experience of Mobile Applications,” *Lnai*, vol. 8532, pp. 301–310, 2014.
- [391] M. Zwinderman *et al.*, “Using video prototypes for evaluating design concepts with users: A comparison to usability testing,” *Lect. Notes Comput. Sci. (including Subser. Lect. Notes Artif. Intell. Lect. Notes Bioinformatics)*, vol. 8118 LNCS, no. PART 2, pp. 774–781, 2013.
- [392] F. Banville, J. Couture, E. Verhulst, J. Besnard, P. Richard, and P. Allain, “Using Virtual Reality

- to Assess the Elderly : The Impact of Human-Computer Interfaces on Cognition," vol. 3, pp. 113–123, 2017.
- [393] H. J. Hwang, J. M. Lee, and D. Y. Ju, "Verification of Stereotype on Women Observing Gender Difference on UX of Wearable Device," pp. 214–223, 2015.
  - [394] H. J. A. Den Akker, R. Klaassen, and A. Nijholt, "Virtual Coaches for Healthy Lifestyle," vol. II, pp. 121–149.
  - [395] A. Welivita, N. Nimalsiri, R. Wickramasinghe, U. Pathirana, and C. Gamage, "Virtual Product Try-On Solution for E-Commerce Using Mobile Augmented Reality," *Augment. Reality, Virtual Reality, Comput. Graph.*, vol. 10324, pp. 438–447, 2017.
  - [396] A. Geiger, I. Bewersdorf, E. Brandenburg, and R. Stark, "Visual Feedback for Grasping in Virtual Reality Environments for an Interface to Instruct Digital Human Models," *Adv. Usability User Exp.*, vol. 607, 2018.
  - [397] M. Lankes and T. Mirlacher, "Affective game dialogues: Using affect as an explicit input method in game dialogue systems BT - 13th International Conference on Advances in Computer Games, ACG 2011, November 20, 2011 - November 22, 2011," vol. 7168 LNCS, pp. 333–341, 2012.
  - [398] J. Breitner, "Visual Theorem Proving with the Incredible Proof Machine," *J. Autom. Reason.*, vol. 9807, pp. 123–139, 2016.
  - [399] V. Fagundes, R. Fernandes, C. Santos, and T. Tavares, "Visualization of Climate Data from User Perspective: Evaluating User Experience in Graphical User Interfaces and Immersive Interfaces," *Hum. Interface Manag. Inf. Information, Knowl. Interact. Des.*, vol. 10273, pp. 55–70, 2017.
  - [400] M. Braun, N. Broy, B. Pfleging, and F. Alt, "Visualizing natural language interaction for conversational in-vehicle information systems to minimize driver distraction," *J. Multimodal User Interfaces*, 2019.
  - [401] L. Verde, G. De Pietro, and G. Sannino, "Vox4Health: Preliminary Results of a Pilot Study for the Evaluation of a Mobile Voice Screening Application," *Adv. Intell. Syst. Comput.*, vol. 476, no. ISAmI 2016, pp. 1341–140, 2016.
  - [402] J. Novak and S. Schmidt, "When Joy Matters : The Importance of Hedonic Stimulation in Collocated Collaboration with," pp. 618–629, 2009.
  - [403] E. Ferrera *et al.*, "XMPP-based infrastructure for IoT network management and rapid services and applications development," *Ann. des Telecommun. Telecommun.*, vol. 72, no. 7–8, pp. 443–457, 2017.
  - [404] Z. Hussain *et al.*, "Agile user-centered design applied to a mobile multimedia streaming application," *Lect. Notes Comput. Sci. (including Subser. Lect. Notes Artif. Intell. Lect. Notes Bioinformatics)*, vol. 5298 LNCS, pp. 313–330, 2008.
  - [405] I. Weshung, M. Schulz, K.-P. Engelbrecht, J. Niemman, and S. Möller, "All Users Are (Not) Equal - The Influence of User Characteristics on Perceived Quality, Modality Choice and Performance," *Proc. Paralinguistic Inf. its Integr. Spok. Dialogue Syst. Work.*, pp. 125–132, 2011.
  - [406] G. Schiavo, E. Mencarini, A. Cappelletti, O. Stock, and M. Zancanaro, "Ambient Influence for Promoting Balanced Participation in Group Brainstorming," *Ambient Intell.*, vol. 8850, pp. 140–144, 2014.
  - [407] G. S. Méndez and D. Reidsma, "A BML based embodied conversational agent for a personality detection program," *Lect. Notes Comput. Sci. (including Subser. Lect. Notes Artif. Intell. Lect. Notes Bioinformatics)*, vol. 6895 LNAI, pp. 468–469, 2011.
  - [408] K. Huang, H. Lin, and C. Lu, "An Evaluation of User Experience of Web Main Menu on Different Mobile Devices," *Hum. Asp. IT Aged Popul. Accept. Commun. Particip.*, vol. 10926, no. Gardner 2011, pp. 235–251, 2018.

- [409] O. Ortégón-Romero, K. de Oliveira, L. Porcher, and L. Krug, "Analysis of Mouse Movement and Body Response in Distance Learning Environments," *Commun. Comput. Inf. Sci.*, vol. 735, pp. 595–607, 2017.
- [410] E. Celi, "Application of Dashboards and Scorecards for Learning Models IT Risk Management: A User Experience," *Lect. Notes Comput. Sci. (including Subser. Lect. Notes Artif. Intell. Lect. Notes Bioinformatics)*, vol. 9188, pp. 153–165, 2015.
- [411] J. Chai *et al.*, "Application of frontal EEG asymmetry to user experience research," *Lect. Notes Comput. Sci. (including Subser. Lect. Notes Artif. Intell. Lect. Notes Bioinformatics)*, vol. 8532 LNAI, pp. 234–243, 2014.
- [412] S. Cano, D. M. Alghazzawi, J. M. Arteaga, H. M. Fardoun, C. A. Collazos, and V. B. Amador, "Applying the information search process model to analyze aspects in the design of serious games for children with hearing impairment," *Univers. Access Inf. Soc.*, vol. 17, no. 1, pp. 83–95, 2018.
- [413] Y. Li, P. Tennent, and S. Cobb, "Appropriate Control Methods for Mobile Virtual Exhibitions," vol. 904, Springer International Publishing, 2019, pp. 165–183.
- [414] K. Kuusinen, "Are Software Developers Just Users of Development Tools? Assessing Developer Experience of a Graphical User Interface Designer," *Human-Centered Error-Resilient Syst. Dev.*, vol. 9856, pp. 215–233, 2016.
- [415] C. Wienrich, D. Nina, S. Kock, K. Schindler, and O. Traupe, "Assessing User Experience in Virtual Reality – A Comparison of Different Measurements," *Des. User Exp. Usability Theory Pract.*, vol. 10918, no. 1, pp. 573–589, 2018.
- [416] J. Hu, D. Le, M. Funk, F. Wang, and M. Rauterberg, "Attractiveness of an interactive public art installation," *Lect. Notes Comput. Sci. (including Subser. Lect. Notes Artif. Intell. Lect. Notes Bioinformatics)*, vol. 8028 LNCS, pp. 430–438, 2013.
- [417] B. Bähr and S. Möller, "Blended Prototyping," in *Rethink! Prototyping: Transdisciplinary Concepts of Prototyping*, 2016, pp. 129–160.
- [418] M. Budde, T. Riedel, M. Köpke, M. Berning, and M. Beigl, "A comparative study to evaluate the usability of context-based Wi-Fi access mechanisms," *Lect. Notes Comput. Sci. (including Subser. Lect. Notes Artif. Intell. Lect. Notes Bioinformatics)*, vol. 8515 LNCS, no. PART 3, pp. 451–462, 2014.
- [419] M. Hopmann, M. Gutierrez, D. Thalmann, and F. Vexo, "Bridging digital and physical worlds using tangible drag-and-drop interfaces," *Lect. Notes Comput. Sci. (including Subser. Lect. Notes Artif. Intell. Lect. Notes Bioinformatics)*, vol. 6670 LNCS, pp. 1–18, 2011.
- [420] T. Paul, M. Stopczynski, D. Puscher, M. Volkamer, and T. Strufe, "C4PS - Helping Facebookers Manage Their Privacy Settings," pp. 188–201, 2012.
- [421] D. Anastasiou and E. Ras, "Case Study Analysis on Collaborative Problem Solving Using a Tangible Interface," *Technol. Enhanc. Assess.*, vol. 653, pp. 11–22, 2017.
- [422] T. Schneidermeier, F. Hertlein, and C. Wolff, "Changing paradigm - Changing experience? comparative usability evaluation of windows 7 and windows 8," in *Lecture Notes in Computer Science (including subseries Lecture Notes in Artificial Intelligence and Lecture Notes in Bioinformatics)*, 2014.
- [423] W. Ilmberger, M. Schrepp, and T. Held, "Cognitive processes causing the relationship between aesthetics and usability," *Lect. Notes Comput. Sci. (including Subser. Lect. Notes Artif. Intell. Lect. Notes Bioinformatics)*, vol. 5298 LNCS, pp. 43–54, 2008.
- [424] S. Döweling, T. Tahiri, J. Riemann, and M. Mühlhäuser, "Collaborative Interaction with Geospatial Data—A Comparison of Paper Maps, Desktop GIS and Interactive Tabletops," *Collab. Meets Interact. Spaces*, pp. 319–348, 2017.
- [425] A. Habibovic, J. Andersson, J. Nilsson, M. Nilsson, and C. Edgren, "Command-Based Driving

- for Tactical Control of Highly Automated Vehicles Azra," *Adv. Hum. Asp. Transp.*, vol. 484, pp. 499–509, 2017.
- [426] W. Wetzlinger, A. Auinger, and M. Dörflinger, "Comparing Effectiveness, Efficiency, Ease of Use, Usability and User Experience When Using Tablets and Laptops," 2014.
  - [427] H. Donker and M. Blumberg, "Computer support of team work on mobile devices," *Lect. Notes Comput. Sci. (including Subser. Lect. Notes Artif. Intell. Lect. Notes Bioinformatics)*, vol. 6763 LNCS, no. PART 3, pp. 38–47, 2011.
  - [428] P. Kiefer, I. Giannopoulos, V. Athanasios Anagnostopoulos, J. Schöning, and M. Raubal, "Controllability matters: The user experience of adaptive maps," *Geoinformatica*, vol. 21, no. 3, pp. 619–641, 2017.
  - [429] G. Christou, "A comparison between experienced and inexperienced video game players' perceptions," *Human-centric Comput. Inf. Sci.*, vol. 3, no. 1, pp. 1–15, 2013.
  - [430] L. Carneiro, F. Rebelo, P. Noriega, and J. F. Pais, "Could the Design Features of a Wheelchair Influence the User Experience and Stigmatization Perceptions of the Users?," *Adv. Ergon. Des.*, vol. 588, 2018.
  - [431] Ma. Rittenbruch, "CubIT: Design and Evaluation of a Collaboration-Tool for Large Interactive Wall Surfaces," in *Collaboration Meets Interactive Spaces*, 2016, pp. 125–152.
  - [432] S. Loehmann, M. Knobel, M. Lamara, and A. Butz, "Culturally independent gestures for in-car interactions," *Lect. Notes Comput. Sci. (including Subser. Lect. Notes Artif. Intell. Lect. Notes Bioinformatics)*, vol. 8119 LNCS, no. PART 3, pp. 538–545, 2013.
  - [433] B. Yu, J. Hu, M. Funk, and L. Feijs, "DeLight: biofeedback through ambient light for stress intervention and relaxation assistance," *Pers. Ubiquitous Comput.*, vol. 22, no. 4, pp. 787–805, 2018.
  - [434] A. M. Bernardos, J. M. Sánchez, J. I. Portillo, X. Wang, J. A. Besada, and J. R. Casar, "Design and deployment of a contactless hand-shape identification system for smart spaces," *J. Ambient Intell. Humaniz. Comput.*, vol. 7, no. 3, pp. 357–370, 2016.
  - [435] C. Vandevelde, F. Wyffels, M. C. Ciocci, B. Vanderborght, and J. Saldien, "Design and evaluation of a DIY construction system for educational robot kits," *Int. J. Technol. Des. Educ.*, vol. 26, no. 4, pp. 521–540, 2016.
  - [436] V. Adhikarla, G. Jakus, and J. Sodnik, "Design and Evaluation of Freehand Gesture Interaction for Light Field Display," *Lect. Notes Comput. Sci. (including Subser. Lect. Notes Artif. Intell. Lect. Notes Bioinformatics)*, vol. 9170, pp. 54–65, 2015.
  - [437] J. Sliwinski, M. Katsikitis, and C. M. Jones, "Design and Evaluation of the Interactive Mindfulness Program and Virtual Evaluation (IMProVE) Game," *J. Cogn. Enhanc.*, vol. 3, no. 1, pp. 52–63, 2018.
  - [438] J. Mercado, I. Espinosa-Curiel, L. Escobedo, and M. Tentori, "Developing and evaluating a BCI video game for neurofeedback training: the case of autism," *Multimed. Tools Appl.*, 2018.
  - [439] I. Hastreiter, S. Krause, T. Schneidermeier, and C. Wolff, "Developing UX for collaborative mobile prototyping," in *Lecture Notes in Computer Science (including subseries Lecture Notes in Artificial Intelligence and Lecture Notes in Bioinformatics)*, 2014.
  - [440] L. Martínez-Normand and M. Pluke, "A decision-tree approach for the applicability of the accessibility standard EN 301 549," *Lect. Notes Comput. Sci. (including Subser. Lect. Notes Artif. Intell. Lect. Notes Bioinformatics)*, vol. 8548 LNCS, no. PART 2, pp. 295–302, 2014.
  - [441] K. Tomita, "Does the Visual Appeal of Instructional Media Affect Learners' Motivation Toward Learning?," *TechTrends*, vol. 62, no. 1, pp. 103–112, 2018.
  - [442] M. Alrige and S. Chatterjee, "Easy Nutrition: A Customized Dietary App to Highlight the Food Nutritional Value," in *Designing for a Digital and Globalized World*, vol. 10844, Springer International Publishing, 2018, pp. 132–145.

- [443] D. Harris, "Efficiency and User Experience of Gaze Interaction in an Automotive Environment Benedikt," in *Engineering Psychology and Cognitive Ergonomics*, 2017, pp. 429–444.
- [444] D. Reich and E. Dittrich, "Empirical investigation of transferring cockpit interactions from virtual to real-life environments," *Lect. Notes Comput. Sci. (including Subser. Lect. Notes Artif. Intell. Lect. Notes Bioinformatics)*, vol. 8022 LNCS, no. PART 2, pp. 301–309, 2013.
- [445] G. Leitner, A. J. Fercher, and C. Lassen, "End users programming smart homes - A case study on scenario programming," *Lect. Notes Comput. Sci. (including Subser. Lect. Notes Artif. Intell. Lect. Notes Bioinformatics)*, vol. 7947 LNCS, pp. 217–236, 2013.
- [446] M. Vaaranemi, M. Freidank, and R. Westermann, "Enhancing the Visibility of Labels in 3D Navigation Maps," *Prog. New Trends 3D Geoinf. Sci.*, pp. 23–40, 2013.
- [447] N. Köster, S. Wrede, and P. Cimiano, "Evaluating a Graph Query Language for Human-Robot Interaction Data in Smart Environments," *Softw. Technol. Appl. Found.*, vol. 10748, pp. 263–279, 2018.
- [448] M. Lankes, R. Bernhaupt, and M. Tscheligi, "Evaluating User Experience Factors Using Experiments: Expressive Artificial Faces Embedded in Contexts," 2010.
- [449] H. Gürkök, G. Hakvoort, and M. Poel, "Evaluating user experience in a selection based brain-computer interface game: A comparative study," in *Lecture Notes in Computer Science (including subseries Lecture Notes in Artificial Intelligence and Lecture Notes in Bioinformatics)*, 2011.
- [450] I. Wechsung and A. B. Naumann, "Evaluation methods for multimodal systems: A comparison of standardized usability questionnaires," *Lect. Notes Comput. Sci. (including Subser. Lect. Notes Artif. Intell. Lect. Notes Bioinformatics)*, vol. 5078 LNCS, pp. 276–284, 2008.
- [451] G. W. Young, D. Murphy, and J. Weeter, "A Functional Analysis of Haptic Feedback in Digital Musical Instrument Interactions," pp. 95–122, 2018.
- [452] A. Rodrigues *et al.*, "Evaluation of the Use of Eye and Head Movements for Mouse-like Functions by Using IOM Device," *Univers. Access Human-Computer Interact. Interact. Tech. Environ.*, vol. 9738, pp. 81–91, 2016.
- [453] S. Kyriazakos *et al.*, *eWALL: An Open-Source Cloud-Based eHealth Platform for Creating Home Caring Environments for Older Adults Living with Chronic Diseases or Frailty*, vol. 97, no. 2, 2017.
- [454] P. Marti and I. Iacono, "Experience over time: evaluating the experience of use of a squeezable interface in the medium term," *Multimed. Tools Appl.*, vol. 76, no. 4, pp. 5095–5116, 2017.
- [455] P. M. Kluckner, A. Weiss, J. Schrammel, and M. Tscheligi, "Exploring Persuasion in the Home : Results of a Long-Term Study on Energy Consumption Behavior," pp. 150–165, 2013.
- [456] I. Triantafyllidou and A. Chatzitsakiroglou, "FingerTrips on Tangible Augmented 3D Maps for Learning History," *Interact. Mob. Commun. Technol. Learn.*, vol. 725, pp. 465–476, 2018.
- [457] K. Kuusinen, H. Petrie, F. Fagerholm, and T. Mikkonen, "Flow, Intrinsic Motivation, and Developer Experience in Software Engineering," *Agil. Process. Softw. Eng. Extrem. Program.*, vol. 251, pp. 104–117, 2016.
- [458] S. Eimler, A. Von Der Pütten, U. Schächtle, L. Carstens, and N. Krämer, "Following the white rabbit - A robot rabbit as vocabulary trainer for beginners of English," *Lect. Notes Comput. Sci. (including Subser. Lect. Notes Artif. Intell. Lect. Notes Bioinformatics)*, vol. 6389 LNCS, pp. 322–339, 2010.
- [459] T. Neumayr, M. A. B. S. Pimminger, S. Sch, and M. Gst, "From Assistive Technology to Industry and Back – Experiences with an Applied Domain Transfer," *Comput. Help. People with Spec. Needs*, vol. 10897, pp. 541–551, 2018.
- [460] A. Niels and C. Zagel, "Gamified Self-service Checkouts: The Influence of Computer-Related Causal Attributions on User Experience and Motivation," *Adv. Hum. Side Serv. Eng.*, vol. 601, pp. 24–36, 2018.
- [461] M. Lankes and B. Stiglbauer, "GazeAR: Mobile Gaze-Based Interaction in the Context of

- Augmented Reality Games," *Augment. Reality, Virtual Reality, Comput. Graph.*, vol. 9768, pp. 397–406, 2016.
- [462] B. P. Jónsson, G. Tómasson, H. Sigurpórsson, Á. Eiríksdóttir, L. Amsaleg, and M. K. Lárusdóttir, "A Multi-Dimensional Data Model for Personal Photo Browsing," pp. 345–356, 2014.
  - [463] B. Trevisan, A. Willach, E. Jakobs, and R. Schmitt, "Gender-Specific Kansei Engineering : Using AttrakDiff2," pp. 167–174.
  - [464] M. Rehm and K. Leichtenstern, "Gesture-based mobile training of intercultural behavior," *Multimed. Syst.*, vol. 18, no. 1, pp. 33–51, 2012.
  - [465] H. Richter, S. Löhmann, and A. Wiethoff, "HapticArmrest: Remote tactile feedback on touch surfaces using combined actuators," *Lect. Notes Comput. Sci. (including Subser. Lect. Notes Artif. Intell. Lect. Notes Bioinformatics)*, vol. 7040 LNCS, pp. 1–10, 2011.
  - [466] P. Lubos, O. Ariza, G. Bruder, F. Daiber, F. Steinicke, and A. Krüger, "HoverSpace Analyses of the Perceived Spatial Affordances of Hover Interaction Above Tabletop Surfaces," *Lect. Notes Comput. Sci. (including Subser. Lect. Notes Artif. Intell. Lect. Notes Bioinformatics)*, vol. 9298, pp. 259–277, 2015.
  - [467] I. Wechsung, R. Schleicher, and S. Möller, "How context determines perceived quality and modality choice. Secondary task paradigm applied to the evaluation of multimodal interfaces," *Proc. Paralinguistic Inf. its Integr. Spok. Dialogue Syst. Work.*, pp. 327–340, 2011.
  - [468] B. V. B, A. Schneider, E. Krueger, F. Br, K. Opwis, and E. D. Mekler, "How to Use Plain and Easy-to-Read Language for a Positive User Experience," vol. 1, pp. 514–522, 2018.
  - [469] M. Winckler, R. Bernhaupt, and C. Bach, "Identification of UX dimensions for incident reporting systems with mobile applications in urban contexts: a longitudinal study," *Cogn. Technol. Work*, 2016.
  - [470] M. Haase, M. Krippel, M. Wahl, and S. Ferchow, "Impact of Performance and Subjective Appraisal of Performance on the Assessment of Technical Systems," *Human-Computer Interact. Theory, Des. Dev. Pract.*, vol. 9731, pp. 291–301, 2016.
  - [471] J. Ferraz de Abreu, P. Almeida, and P. Beca, "InApp Questions – an Approach for Contextual Evaluation of Applications," *Commun. Comput. Inf. Sci.*, vol. 689, pp. 163–175, 2017.
  - [472] S. Mach, A. Kastrau, and F. Schmalfu, "Information at Hand – Using Wearable Devices to Display Task Information in the Context of Industry 4.0," *HCI Int. 2018 – Posters' Ext. Abstr.*, vol. 850, no. 723277, pp. 93–100, 2018.
  - [473] N. Girard, S. Cherké, H. Soubaras, and K. Nieuwenhuis, "A New Gesture Control for Zooming on Tablets and Smartphones for Visually Impaired People," *Springer Int. Publ. AG, part Springer Nat. 2018*, pp. 351–358, 2018.
  - [474] I. Rodriguez, P. O. Rossel, M. Fernández, C. Fuentes, A. León, and V. Herskovic, "InMyDay: a study on input styles for a digital diary for older users," *J. Ambient Intell. Humaniz. Comput.*, vol. 0, no. 0, p. 0, 2019.
  - [475] A. Sánchez, E. Villalba-Mora, I. Peinado, and L. Rodriguez-Mañas, "Integrated Care Programme for older adults: Analysis and improvement," *J. Nutr. Heal. Aging*, vol. 21, no. 8, pp. 867–873, 2017.
  - [476] M. De Clerk, G. Schmierer, and M. Dangelmaier, "Interaction Techniques for Virtual Reality Based Automotive Design Reviews," vol. 1, pp. 39–48, 2017.
  - [477] J. Gugenheimer, C. Winkler, D. Wolf, and E. Rukzio, "Interaction with Adaptive and Ubiquitous User Interfaces," *Companion Technol.*, pp. 209–229, 2017.
  - [478] A. Löcken, F. Yan, W. Heuten, and S. Boll, "Investigating driver gaze behavior during lane changes using two visual cues: ambient light and focal icons," *J. Multimodal User Interfaces*, 2019.

- [479] S. Memeti, S. Pillana, M. Ferati, A. Kurti, and I. Jusufi, *IoTutor: How Cognitive Computing Can Be Applied to Internet of Things Education*, vol. 1, no. 20150088. Springer International Publishing, 2019.
- [480] P. Almeida *et al.*, "Iterative User Experience Evaluation of a User Interface for the Unification of TV Contents," *Appl. Usability Interact. Telev.*, vol. 813, pp. 44–57, 2018.
- [481] J. Frommer *et al.*, "LAST MINUTE : An Empirical Experiment in User- Companion Interaction and Its Evaluation."
- [482] D. Zele, Na. Jurancic, I. Kozuh, and M. Debevc, "Life-Support System for Elderly as Assistance in Independent Living," *Lect. Notes Comput. Sci. (including Subser. Lect. Notes Artif. Intell. Lect. Notes Bioinformatics)*, vol. 10461 LNCS, pp. 173–182, 2017.
- [483] A. Silva, D. Marques, C. Duarte, M. A. Viana-Baptista, and L. Carriço, "LOST-map: A victim-sourced rescue map of disaster areas," *Lect. Notes Comput. Sci. (including Subser. Lect. Notes Artif. Intell. Lect. Notes Bioinformatics)*, vol. 8658 LNCS, pp. 311–318, 2014.
- [484] M. Shieh, S. Meng, and T. Y. Chuang, *A Study of Applying Slow Technology on Wearable Devices*, vol. 10902. Springer International Publishing, 2018.
- [485] D. Pietschmann and S. Rusdorf, "Matching levels of task difficulty for different modes of presentation in a VR table tennis simulation by using assistance functions and regression analysis," *Lect. Notes Comput. Sci. (including Subser. Lect. Notes Artif. Intell. Lect. Notes Bioinformatics)*, vol. 8525 LNCS, no. PART 1, pp. 406–417, 2014.
- [486] A. Müller *et al.*, "Measuring the Influence of User Experience on Banking Customers' Trust," *HCI Business, Gov. Organ.*, vol. 10923, pp. 382–395, 2018.
- [487] N. Morina *et al.*, "Mental health assessments in refugees and asylum seekers: Evaluation of a tablet-assisted screening software," *Confl. Health*, vol. 11, no. 1, pp. 1–9, 2017.
- [488] K. Nuelle, S. Bringeland, S. Tappe, B. Deml, and T. Ortmaier, "Mobile Augmented Reality System for Craftsmen," in *Developing Support Technologies*, vol. 23, Springer International Publishing, 2018, pp. 169–176.
- [489] D. Griol and Z. Callejas, "Mobile Conversational Agents for Context-Aware Care Applications," *Cognit. Comput.*, vol. 8, no. 2, pp. 336–356, 2016.
- [490] S. Cano, V. Peñeñory, C. Collazos, H. M. Fardoun, and D. M. Alghazzawi, "Model for Design of Serious Game for Rehabilitation in Children with Cochlear Implant," *ICTs Improv. Patients Rehabil. Res. Tech.*, vol. 665, pp. 94–105, 2017.
- [491] J. Hussain *et al.*, "Model-based adaptive user interface based on context and user experience evaluation," *J. Multimodal User Interfaces*, 2018.
- [492] J. P. Leuteritz, H. Widloither, and M. Klüh, "Multi-level validation of the isometrics questionnaire based on qualitative and quantitative data obtained from a conventional usability test," *Lect. Notes Comput. Sci. (including Subser. Lect. Notes Artif. Intell. Lect. Notes Bioinformatics)*, vol. 5610 LNCS, no. PART 1, pp. 304–313, 2009.
- [493] B. Weiss, I. Wechsung, S. Hillmann, and S. Möller, "Multimodal HCI: exploratory studies on effects of first impression and single modality ratings in retrospective evaluation," *J. Multimodal User Interfaces*, vol. 11, no. 2, pp. 115–131, 2017.
- [494] M. Á. Fernández, V. Peláez, G. López, J. L. Carus, and V. Lobato, "Multimodal interfaces for the smart home: Findings in the process from architectural design to user evaluation," *Lect. Notes Comput. Sci. (including Subser. Lect. Notes Artif. Intell. Lect. Notes Bioinformatics)*, vol. 7656 LNCS, pp. 173–180, 2012.
- [495] J. Coelho, F. Rito, and C. Duarte, "'You, me & TV' — Fighting social isolation of older adults with Facebook, TV and multimodality," *Int. J. Hum. Comput. Stud.*, vol. 98, pp. 38–50, 2017.
- [496] G. Jakus, C. Dicke, and J. Sodnik, "A user study of auditory, head-up and multi-modal displays in vehicles," *Appl. Ergon.*, vol. 46, pp. 184–192, 2015.

- [497] E. Nofal, R. Stevens, T. Coomans, and A. Vande Moere, "Communicating the spatiotemporal transformation of architectural heritage via an in-situ projection mapping installation," *Digit. Appl. Archaeol. Cult. Herit.*, vol. 11, p. e00083, 2018.
- [498] E. Loup-Escande, R. Frenoy, G. Poplimont, I. Thouvenin, O. Gapenne, and O. Megalakaki, "Contributions of mixed reality in a calligraphy learning task: Effects of supplementary visual feedback and expertise on cognitive load, user experience and gestural performance," *Comput. Human Behav.*, vol. 75, pp. 42–49, 2017.
- [499] A. Poushneh and A. Z. Vasquez-Parraga, "Discernible impact of augmented reality on retail customer's experience, satisfaction and willingness to buy," *J. Retail. Consum. Serv.*, vol. 34, pp. 229–234, 2017.
- [500] J. Abreu, P. Almeida, T. Silva, and R. Oliveira, "Discovering TV Contents in a Second Screen App: Perspectives from Portuguese and Brazilian Markets," *Procedia Comput. Sci.*, vol. 64, pp. 1240–1247, 2015.
- [501] L. Desteghe *et al.*, "Effectiveness and usability of an online tailored education platform for atrial fibrillation patients undergoing a direct current cardioversion or pulmonary vein isolation," *Int. J. Cardiol.*, vol. 272, pp. 123–129, 2018.
- [502] Y. Udjaja, "EKSPANPIXEL BLADSY STRANICA: Performance Efficiency Improvement of Making Front-End Website Using Computer Aided Software Engineering Tool," *Procedia Comput. Sci.*, vol. 135, pp. 292–301, 2018.
- [503] A. Skulmowski, S. Pradel, T. Kühnert, G. Brunnett, and G. D. Rey, "Embodied learning using a tangible user interface: The effects of haptic perception and selective pointing on a spatial learning task," *Comput. Educ.*, vol. 92–93, pp. 64–75, 2016.
- [504] V. Rieuf, C. Bouchard, V. Meyrueis, and J.-F. Omhover, "Emotional activity in early immersive design: Sketches and moodboards in virtual reality," *Des. Stud.*, vol. 48, pp. 43–75, 2017.
- [505] M. K. Curumsing, N. Fernando, M. Abdelrazek, R. Vasa, K. Mouzakis, and J. Grundy, "Emotion-oriented requirements engineering: A case study in developing a smart home system for the elderly," *J. Syst. Softw.*, vol. 147, pp. 215–229, 2019.
- [506] G. Desolda, C. Ardito, M. F. Costabile, and M. Matera, "End-user composition of interactive applications through actionable UI components," *J. Vis. Lang. Comput.*, vol. 42, pp. 46–59, 2017.
- [507] B. R. Barricelli and S. Valtolina, "A visual language and interactive system for end-user development of internet of things ecosystems," *J. Vis. Lang. Comput.*, vol. 40, pp. 1–19, 2017.
- [508] A. Somrak, I. Humar, M. S. Hossain, M. F. Alhamid, M. A. Hossain, and J. Guna, "Estimating VR Sickness and user experience using different HMD technologies: An evaluation study," *Futur. Gener. Comput. Syst.*, vol. 94, pp. 302–316, 2019.
- [509] C.-H. Wang, Y.-C. Chiang, and M.-J. Wang, "Evaluation of an Augmented Reality Embedded On-line Shopping System," *Procedia Manuf.*, vol. 3, pp. 5624–5630, 2015.
- [510] K. Kaspar, R. R. Gameiro, and P. König, "Feeling good, searching the bad: Positive priming increases attention and memory for negative stimuli on webpages," *Comput. Human Behav.*, vol. 53, pp. 332–343, 2015.
- [511] S. Kyriazakos, V. Valentini, A. Cesario, and R. Zachariae, "FORECAST – A cloud-based personalized intelligent virtual coaching platform for the well-being of cancer patients," *Clin. Transl. Radiat. Oncol.*, vol. 8, pp. 50–59, 2018.
- [512] O. Schneider, K. MacLean, C. Swindells, and K. Booth, "Haptic experience design: What hapticians do and where they need help," *Int. J. Hum. Comput. Stud.*, vol. 107, pp. 5–21, 2017.
- [513] L. Dorcec, D. Pevec, H. Vdovic, J. Babic, and V. Podobnik, "How do people value electric vehicle charging service? A gamified survey approach," *J. Clean. Prod.*, vol. 210, pp. 887–897, 2019.
- [514] K. Kalimullah and D. Sushmitha, "Influence of Design Elements in Mobile Applications on

- User Experience of Elderly People," *Procedia Comput. Sci.*, vol. 113, pp. 352–359, 2017.
- [515] M. Obrist, C. Moser, D. Alliez, and M. Tscheligi, "In-situ evaluation of users' first impressions on a unified electronic program guide concept," *Entertain. Comput.*, vol. 2, no. 3, pp. 191–202, 2011.
  - [516] J. Novak, M. Melenhorst, I. Micheel, C. Pasini, P. Fraternali, and A. E. Rizzoli, "Integrating behavioural change and gamified incentive modelling for stimulating water saving," *Environ. Model. Softw.*, vol. 102, pp. 120–137, 2018.
  - [517] B. Loepp, T. Donkers, T. Kleemann, and J. Ziegler, "Interactive recommending with Tag-Enhanced Matrix Factorization (TagMF)," *Int. J. Hum. Comput. Stud.*, vol. 121, pp. 21–41, 2019.
  - [518] C. Kamienski *et al.*, "Application development for the Internet of Things: A context-aware mixed criticality systems development platform," *Comput. Commun.*, vol. 104, pp. 1–16, 2017.
  - [519] J. H. Israel, E. Wiese, M. Mateescu, C. Zöllner, and R. Stark, "Investigating three-dimensional sketching for early conceptual design—Results from expert discussions and user studies," *Comput. Graph.*, vol. 33, no. 4, pp. 462–473, 2009.
  - [520] S. Popova-Dlugosch, J. Breuninger, B. Lemme, and K. Bengler, "Is Walking Bad for Tablet Use or is Tablet Use Bad for Walking? An Experimental Study on the Effect of Walking on Tablet Use," *IFAC Proc. Vol.*, vol. 46, no. 15, pp. 52–57, 2013.
  - [521] A. Sünnetcioglu, E. Brandenburg, U. Rothenburg, and R. Stark, "ModelTracer: User-friendly Traceability for the Development of Mechatronic Products," *Procedia Technol.*, vol. 26, pp. 365–373, 2016.
  - [522] T. Schürmann, C. Binder, G. Janzarik, and J. Vogt, "Movement transformation on multi-touch devices: Intuition or instructional preparation?," *Appl. Ergon.*, vol. 50, pp. 251–255, 2015.
  - [523] A. Holzer, S. Reber, J. Quarta, J. Mazuze, and D. Gillet, "Padoc: Enabling social networking in proximity," *Comput. Networks*, vol. 111, pp. 82–92, 2016.
  - [524] S. Memeti and S. Pillana, "PAPA: A parallel programming assistant powered by IBM Watson cognitive computing technology," *J. Comput. Sci.*, vol. 26, pp. 275–284, 2018.
  - [525] Z. Vosough, M. Hogräfer, L. A. Royer, R. Groh, and H.-J. Schulz, "Parallel hierarchies: A visualization for cross-tabulating hierarchical categories," *Comput. Graph.*, vol. 76, pp. 1–17, 2018.
  - [526] R. I. F. Vaz, P. O. Fernandes, and A. C. R. Veiga, "Proposal of a Tangible User Interface to Enhance Accessibility in Geological Exhibitions and the Experience of Museum Visitors," *Procedia Comput. Sci.*, vol. 100, pp. 832–839, 2016.
  - [527] A. Komninos, "Pro-social behaviour in crowdsourcing systems: Experiences from a field deployment for beach monitoring," *Int. J. Hum. Comput. Stud.*, vol. 124, pp. 93–115, 2019.
  - [528] P. Rezaei-hachesu *et al.*, "The design and evaluation of an antimicrobial resistance surveillance system for neonatal intensive care units in Iran," *Int. J. Med. Inform.*, vol. 115, pp. 24–34, 2018.
  - [529] A. Ferreira, N. Brändle, P. Widhalm, and C. Olaverri-Monreal, "Assessment of trip validation interfaces for smartphone-based travel surveys," *Transp. Res. Procedia*, vol. 32, pp. 126–134, 2018.
  - [530] K.-C. Hamborg, M. Bruns, F. Ollermann, and K. Kaspar, "The effect of banner animation on fixation behavior and recall performance in search tasks," *Comput. Human Behav.*, vol. 28, no. 2, pp. 576–582, 2012.
  - [531] J. Karjanto, N. M. Yusof, C. Wang, J. Terken, F. Delbressine, and M. Rauterberg, "The effect of peripheral visual feedforward system in enhancing situation awareness and mitigating motion sickness in fully automated driving," *Transp. Res. Part F Traffic Psychol. Behav.*, vol. 58, pp. 678–692, 2018.
  - [532] K. Kaspar, S. König, J. Schwandt, and P. König, "The experience of new sensorimotor contingencies by sensory augmentation," *Conscious. Cogn.*, vol. 28, pp. 47–63, 2014.

- [533] G. Christou, "The interplay between immersion and appeal in video games," *Comput. Human Behav.*, vol. 32, pp. 92–100, 2014.
- [534] J. Grubert, M. Pahud, R. Grasset, D. Schmalstieg, and H. Seichter, "The utility of Magic Lens interfaces on handheld devices for touristic map navigation," *Pervasive Mob. Comput.*, vol. 18, pp. 88–103, 2015.
- [535] M. Haesner, S. Wolf, A. Steinert, and E. Steinhagen-Thiessen, "Touch interaction with Google Glass – Is it suitable for older adults?," *Int. J. Hum. Comput. Stud.*, vol. 110, pp. 12–20, 2018.
- [536] K. Holl, C. Nass, K. Villela, and V. Vieira, "Towards a Lightweight Approach for On-site Interaction Evaluation of Safety-critical Mobile Systems," *Procedia Comput. Sci.*, vol. 94, pp. 41–48, 2016.
- [537] S. Cano, C. A. Collazos, L. F. Aristizábal, C. S. Gonzalez, and F. Moreira, "Towards a methodology for user experience assessment of serious games with children with cochlear implants," *Telemat. Informatics*, vol. 35, no. 4, pp. 993–1004, 2018.
- [538] L. Dupont, J. Hubert, C. Guidat, and M. Camargo, "Understanding user representations, a new development path for supporting Smart City policy: Evaluation of the electric car use in Lorraine Region," *Technol. Forecast. Soc. Change*, vol. 142, pp. 333–346, 2019.
- [539] A. Heinicke, C. Liao, K. Walbaum, J. Bützler, and C. M. Schlick, "User Centered Evaluation of Interactive Data Visualization forms for Document Management Systems," *Procedia Manuf.*, vol. 3, pp. 5427–5434, 2015.
- [540] F. Schwarz and W. Fastenmeier, "Augmented reality warnings in vehicles: Effects of modality and specificity on effectiveness," *Accid. Anal. Prev.*, vol. 101, pp. 55–66, 2017.
- [541] D. Anton, G. Kurillo, and R. Bajcsy, "User experience and interaction performance in 2D/3D telecollaboration," *Futur. Gener. Comput. Syst.*, vol. 82, pp. 77–88, 2018.
- [542] S. Harbich and M. Hassenzahl, "Using behavioral patterns to assess the interaction of users and product," *Int. J. Hum. Comput. Stud.*, vol. 69, no. 7–8, pp. 496–508, 2011.
- [543] F. Schwarz and W. Fastenmeier, "Visual advisory warnings about hidden dangers: Effects of specific symbols and spatial referencing on necessary and unnecessary warnings," *Appl. Ergon.*, vol. 72, pp. 25–36, 2018.
- [544] W. Hajek, I. Gaponova, K. H. Fleischer, and J. Krems, "Workload-adaptive cruise control – A new generation of advanced driver assistance systems," *Transp. Res. Part F Traffic Psychol. Behav.*, vol. 20, pp. 108–120, 2013.
- [545] J. Brade, M. Lorenz, M. Busch, N. Hammer, M. Tscheligi, and P. Klimant, "Being there again – Presence in real and virtual environments and its relation to usability and user experience using a mobile navigation task," *Int. J. Hum. Comput. Stud.*, vol. 101, pp. 76–87, 2017.
- [546] F. L. Cibrian, O. Peña, D. Ortega, and M. Tentori, "BendableSound: An elastic multisensory surface using touch-based interactions to assist children with severe autism during music therapy," *Int. J. Hum. Comput. Stud.*, vol. 107, pp. 22–37, 2017.
- [547] S. Möller, K.-P. Engelbrecht, C. Kühnel, A. Naumann, I. Wechsung, and B. Weiss, "Chapter 14 - Evaluation of Multimodal Interfaces for Ambient Intelligence," in *Human-Centric Interfaces for Ambient Intelligence*, H. Aghajan, R. L.-C. Delgado, and J. C. Augusto, Eds. Oxford: Academic Press, 2010, pp. 347–370.
- [548] A. D. Peacock *et al.*, "Co-designing the next generation of home energy management systems with lead-users," *Appl. Ergon.*, vol. 60, pp. 194–206, 2017.
